# Supplementary material for: Effects of Cannabidiol and Delta-9-Tetrahydrocannabinol on Plasma Endocannabinoid Levels in Healthy Volunteers: A Randomized Double-Blind Four-Arm Crossover Study
Source: PubMed Central journal article supplement (PMC10874814; doi:10.1089/can.2022.0174), 2024-02-12
Supplement: Suppl_Materials.pdf [file Suppl_Materials.pdf]

## Supplementary Materials

Lucy A Chester, Amir Englund, Edward Chesney, Dominic Oliver, Jack Wilson, Simina Sovi, Alex M Dickens, Matej Oresic, Tuomas Linderman, John Hodsoll, Amedeo Minichino, John Strang, Robin M Murray, Tom P Freeman, Philip McGuire. Effects of cannabidiol and delta-9-tetrahydrocannabinol on plasma endocannabinoid levels in healthy volunteers: a randomised double-blind four-arm cross-over study.

### Table of Contents

|                                                                                                                                                     |           |
|-----------------------------------------------------------------------------------------------------------------------------------------------------|-----------|
| <b>EMETHODS</b> .....                                                                                                                               | <b>2</b>  |
| STUDY DRUGS.....                                                                                                                                    | 2         |
| PARTICIPANTS.....                                                                                                                                   | 2         |
| <i>Recruitment</i> .....                                                                                                                            | 2         |
| <i>Inclusion/Exclusion criteria</i> .....                                                                                                           | 2         |
| SCREENING VISIT .....                                                                                                                               | 3         |
| RANDOMISATION AND MASKING .....                                                                                                                     | 3         |
| EXPERIMENTAL VISIT .....                                                                                                                            | 3         |
| <b>EFigure 1. TIMELINE OF BASELINE AND EXPERIMENTAL SESSIONS.</b> .....                                                                             | <b>4</b>  |
| INHALATION PROCEDURE .....                                                                                                                          | 5         |
| <b>EFigure 2. MOLECULAR STRUCTURE OF PLANT CANNABINOIDS, ENDOCANNABINOIDS AND BIOLOGICALLY RELATED COMPOUNDS ANALYSED FROM PLASMA SAMPLES</b> ..... | <b>6</b>  |
| <b>EFigure 3. PLASMA CONCENTRATION-TIME GRAPHS, STRATIFIED BY CBD:THC RATIO</b> .....                                                               | <b>8</b>  |
| <b>EFigure 4. PLASMA CONCENTRATIONS FOLLOWING 10MG THC, 0MG CBD (0:1 RATIO)</b> .....                                                               | <b>10</b> |
| <b>EFigure 5. PRE-INHALATION PLASMA CONCENTRATIONS VS. VISIT NUMBER</b> .....                                                                       | <b>11</b> |
| <b>ETable 1. PHARMACOKINETICS FOR EACH CONTRAST BETWEEN CBD:THC RATIOS – MODELS 1 AND 2</b> .....                                                   | <b>13</b> |
| <b>ETable 2. PLASMA CONCENTRATIONS VS. TIME FOLLOWING 10MG THC, 0MG CBD (0:1 RATIO) – MODEL 3A</b> .....                                            | <b>25</b> |
| <b>ETable 3. PLASMA CONCENTRATIONS VS. TIME FOLLOWING 10MG THC (ALL CBD:THC RATIOS) – MODEL 3B</b> .....                                            | <b>34</b> |
| <b>ETable 4. PRE-INHALATION PLASMA CONCENTRATIONS VS. VISIT NUMBER – MODEL 4A</b> .....                                                             | <b>43</b> |
| <b>ETable 5. PRE-INHALATION PLASMA CONCENTRATIONS OF AEA AND DEA VS. TOTAL CBD DOSE FROM PREVIOUS VISITS – MODELS 4B, 4C AND 4D.</b> .....          | <b>48</b> |
| <b>ERESULTS</b> .....                                                                                                                               | <b>50</b> |
| SEX DIFFERENCES.....                                                                                                                                | 50        |
| EFFECT OF PEAK THC CONCENTRATION.....                                                                                                               | 50        |
| <b>REFERENCES</b> .....                                                                                                                             | <b>51</b> |

## eMethods

### Study Drugs

Standardised cannabis plant material is produced according to Good Manufacturing Practice (GMP) and meet the European Medicines Agency's contaminant levels for products used in the respiratory tract. The products are regulated by the Dutch government's Office of Medicinal Cannabis at the Dutch Ministry of Health, Welfare and Sport.

### Participants

#### Recruitment

Email advertisements were sent to staff and students at King's College London. After completing an initial phone screening, participants were invited to attend a baseline session at King's College Hospital.

#### Inclusion/Exclusion criteria

##### Inclusion criteria:

- i) Be aged between 21-50 years old
- ii) Have used cannabis at least once in the past
- iii) Willing and able to provide written informed consent
- iv) Willing to provide blood samples
- v) Be a fluent English speaker

##### Exclusion criteria:

- i) cannabis use more than one day per week on average over the last 12 months;
- ii) any past or present major mental illness
- iii) a past or present major physical illness
- iv) a score of 5 and above on the Michigan Alcoholism Screening Test <sup>1</sup>;
- v) a score of 5 and above on the Fagerstrom Test for Nicotine Dependence <sup>2</sup>;
- vi) a score of 5 and above on the Drug Abuse Screening Test (DAST-20) <sup>3</sup>;
- vii) past or present use of anti-psychotic or anti-depressant medication;
- viii) a first-degree relative with a psychotic disorder;
- ix) currently use of psychotropic medication;
- x) BMI classified as obese or underweight;
- xi) having taken part in any drug study within the last 30 days or taking part in another study over the course of the trial;
- xii) a known drug sensitivity/allergy towards cannabis or lorazepam; and
- xiii) pregnancy (current or planned) or lactation in women.

Urine pregnancy tests were performed in all female participants at the start of each study visit with drug administration only performed upon a negative result. In addition, participants were asked not to use recreational/illicit drugs at least 7 days and alcohol and tobacco for 24 hours before each visit, confirmed by a urine drug test, alcohol breath test (BAC=0) and carbon monoxide breath test (CO <10 ppm) at each study visit, respectively. Urine drug testing kits tested for amphetamines, benzodiazepines, buprenorphine, cocaine, cannabis, methadone, methamphetamines, morphine, and opiates. Failure to pass tests resulted in rescheduling of the study visit.

### Screening Visit

A study physician was present at screening visits to complete a general medical history and brief physical examination, to exclude subjects with medical conditions. Participants were given the opportunity to discuss the patient information sheet and ask questions before completing consent forms. Psychological scales were completed before the participant was discharged.

### Randomisation and masking

The study design was a 4 phase cross-over with each phase corresponding to one of the 4 CBD:THC dosing ratios: 0:1, 1:1, 2:1, 3:1. Each participant was required to complete all phases corresponding to all ratios of cannabis preparations. For 4 conditions there are 24 possible permutations of sequential order, e.g., Visit 1, 2:1 – Visit 2, 0:1 – Visit 3, 1:1 – Visit 4, 3:1. Randomised sequences were generated in blocks with the first 24 participants allocated each of the 24 possible orders of ratios, as were the next 24 and so on. Where there were fewer participants than possible order sequences, each participant received a random selection from the 24, sampled without replacement. The randomisation list was generated by a statistician not involved with the study, using a customised randomisation script generated in R software v 3.1 (available on request).

The randomisation was double blinded to both researchers and participants. The randomisation list was passed from the independent statistician to the Maudsley Pharmacy who prepared the cannabis preparations. The pharmacy dispensed the study drug to a blinded researcher. The cannabis preparation was then loaded into the filling chamber and vaporised by a research nurse at the Clinical Research Facility (CRF) who was not involved with any other study procedures. Once filled, this was encased with an opaque bag to ensure the blind was maintained (a higher CBD:THC ratio produces a denser vapour). Upon completion of data collection and entry the randomisation schedule was revealed to the research team prior to data analysis.

### Experimental visit

Experimental sessions were scheduled to begin at either 10AM or 12PM. Participants were asked to have a normal (by their own standards) amount of sleep and eat a normal breakfast before arriving. An intravenous cannula was inserted into the participants' arm before the administration of vaporised cannabis.

Rescue medication (oral Lorazepam, 1-2mg prn) was available on request of the participant should they become overly distressed by the effects of the drug but was never required. The participant remained in the CRF until the effects of the drug had worn off (roughly 3 hours after cannabis inhalation). Participants were discharged after completing a field sobriety test and vital signs, and told to avoid driving, operating heavy machinery, or cycling for the next 24 hours. The researchers ensured the participant had contact details to the study physician and knew to contact them with any concern relating to participation in the study or side-effects.

eFigure 1. Timeline of baseline and experimental sessions.

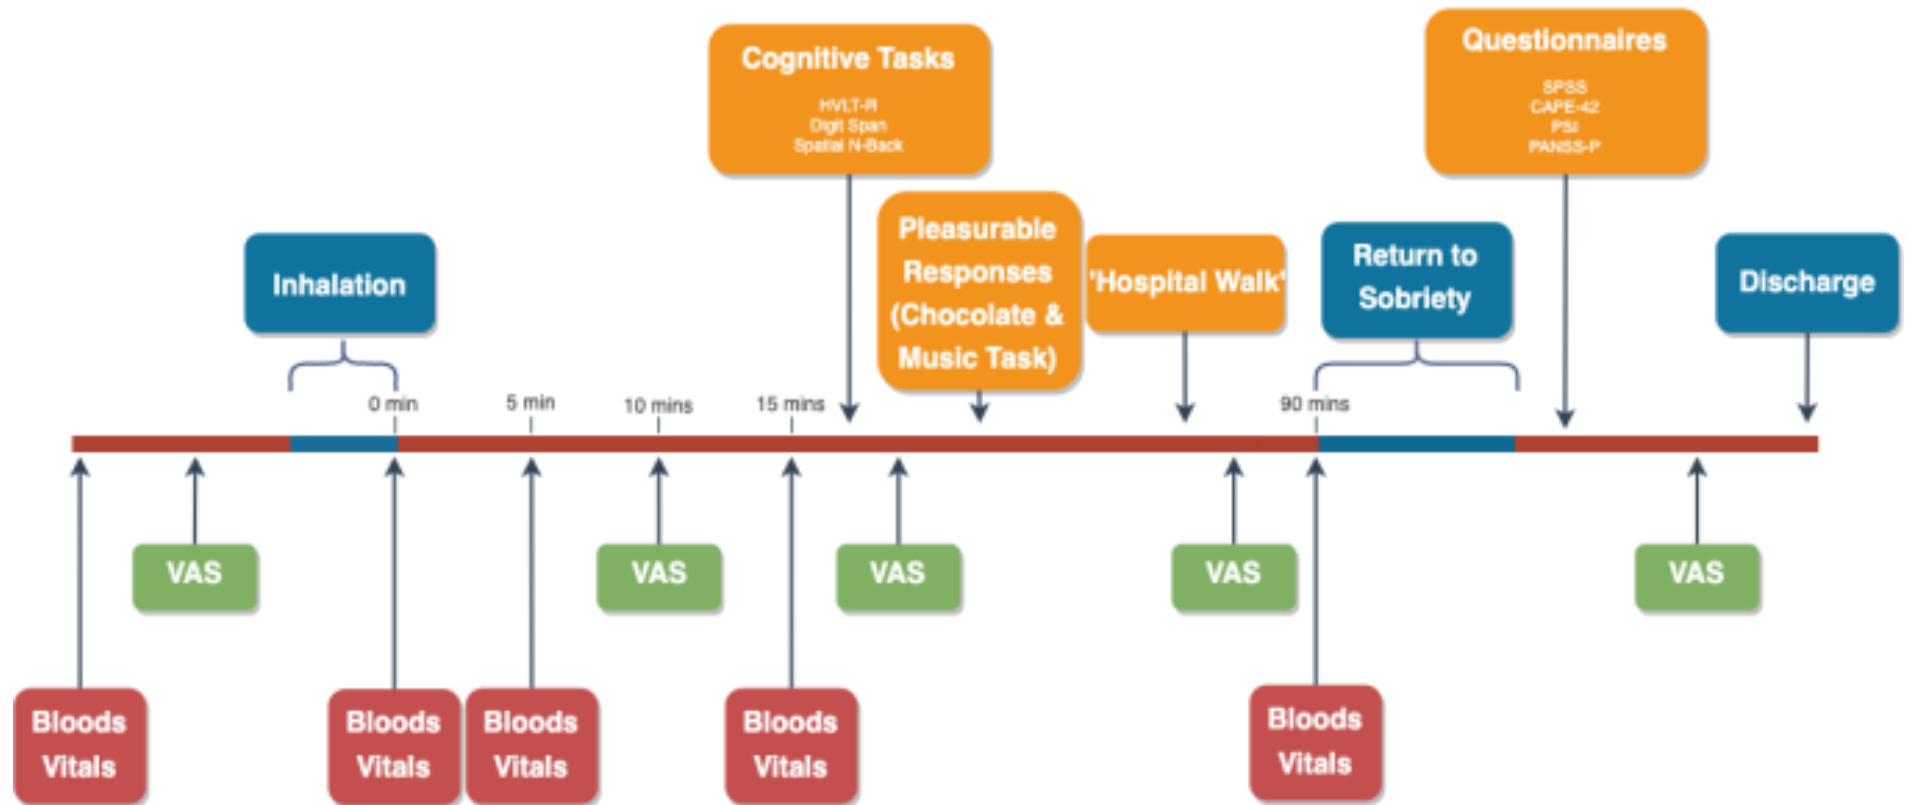

Bloods, blood sample; Vitals, vital signs (HR, BP, O<sub>2</sub> sat.); CAPE-42, Community assessment of Psychic Experiences – state<sup>4</sup>; Digit Span, Forward and reverse digit span; HVLt-R, Hopkins verbal learning task – Revised<sup>5</sup>; PANSS-P, Positive and negative syndrome scale – positive subscale<sup>6</sup>; PSI, Psychotomimetic states inventory<sup>7</sup>; Spatial N-Back task<sup>8</sup>; SPSS, State social paranoia scale<sup>9</sup>; VAS, Visual Analogue Scale.

The timings of the blood draws were based on the known pharmacokinetic profiles of inhaled THC and CBD.<sup>10,11</sup>

See study protocol for full description of timeline and tasks: <https://osf.io/kt3f7>

### Inhalation procedure

Participants were instructed to inhale and hold their breath for 8 seconds before exhaling fully and resting for 8 seconds. Participants inhaled the first balloon standing upright and the second lying on a clinical bed in preparation of blood sampling.

Vaporization of was chosen as the method of drug preparation replicates the bioavailability characteristics of with smoking, while avoiding toxic chemicals from burnt cannabis. A cup of hot lemon and honey water was provided to help with the abrasiveness of cannabis inhalation.

### Sample storage and transport

Plasma samples were stored at  $-80\text{ }^{\circ}\text{C}$  for 329 days (95%CI: 310 to 348) at King's College Hospital, before being transported via a temperature-controlled courier to Turku Metabolomics Centre (Turku Bioscience, Finland).

**eFigure 2.** Molecular structure of plant cannabinoids, endocannabinoids and biologically related compounds analysed from plasma samples

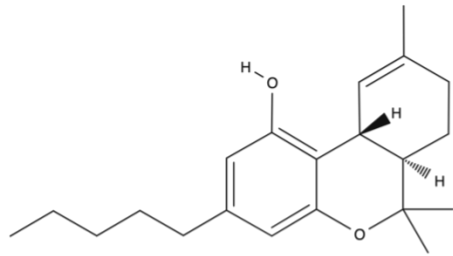

Delta-9-tetrahydrocannabinol - THC

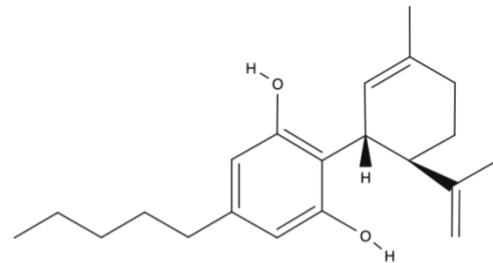

Cannabidiol - CBD

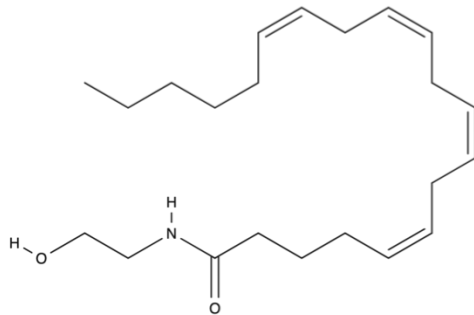

Anandamide - AEA

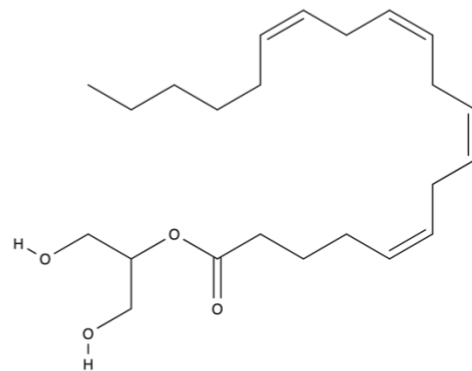

2-Arachidonoylglycerol - 2-AG

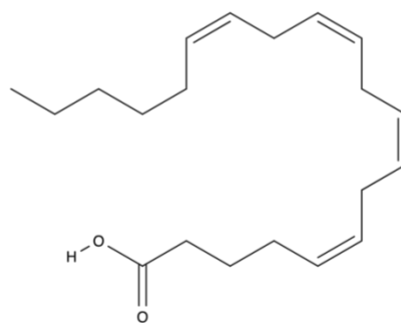

Arachidonic acid - AA

eFigure 2 continued.

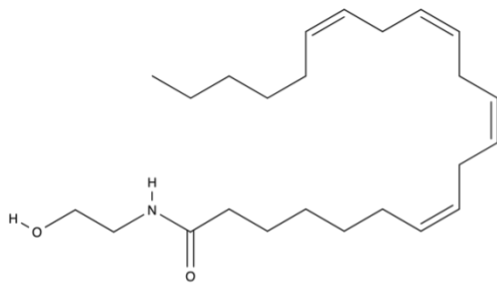

Docosatetraenylethanolamide - DEA

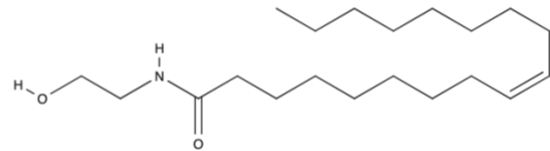

Oleoylethanolamide - OEA

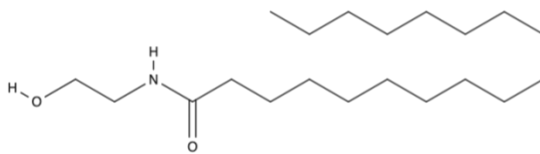

Stearoylethanolamide - SEA

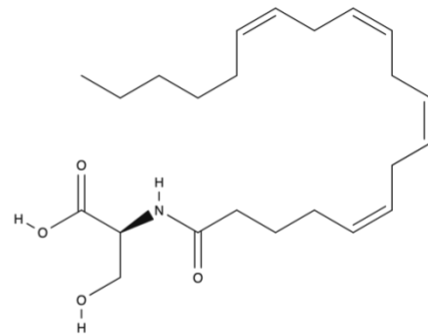

N-arachidonyl-L-serine - ARA-S

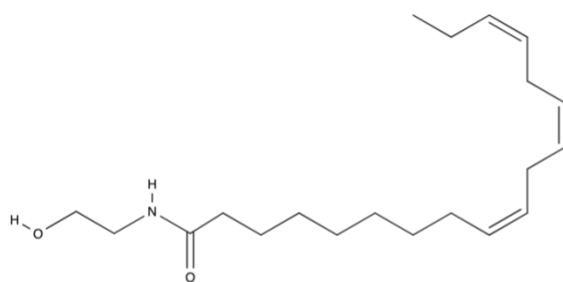

Alpha-linolenylethanolamide - aLEA

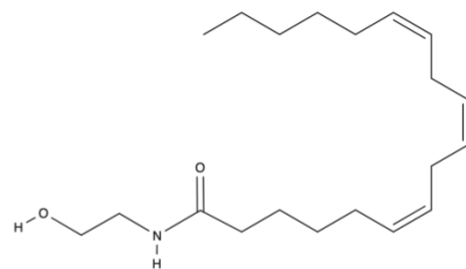

Gamma-linolenylethanolamide - gLEA

eFigure 3. Plasma concentration-time graphs, stratified by CBD:THC ratio

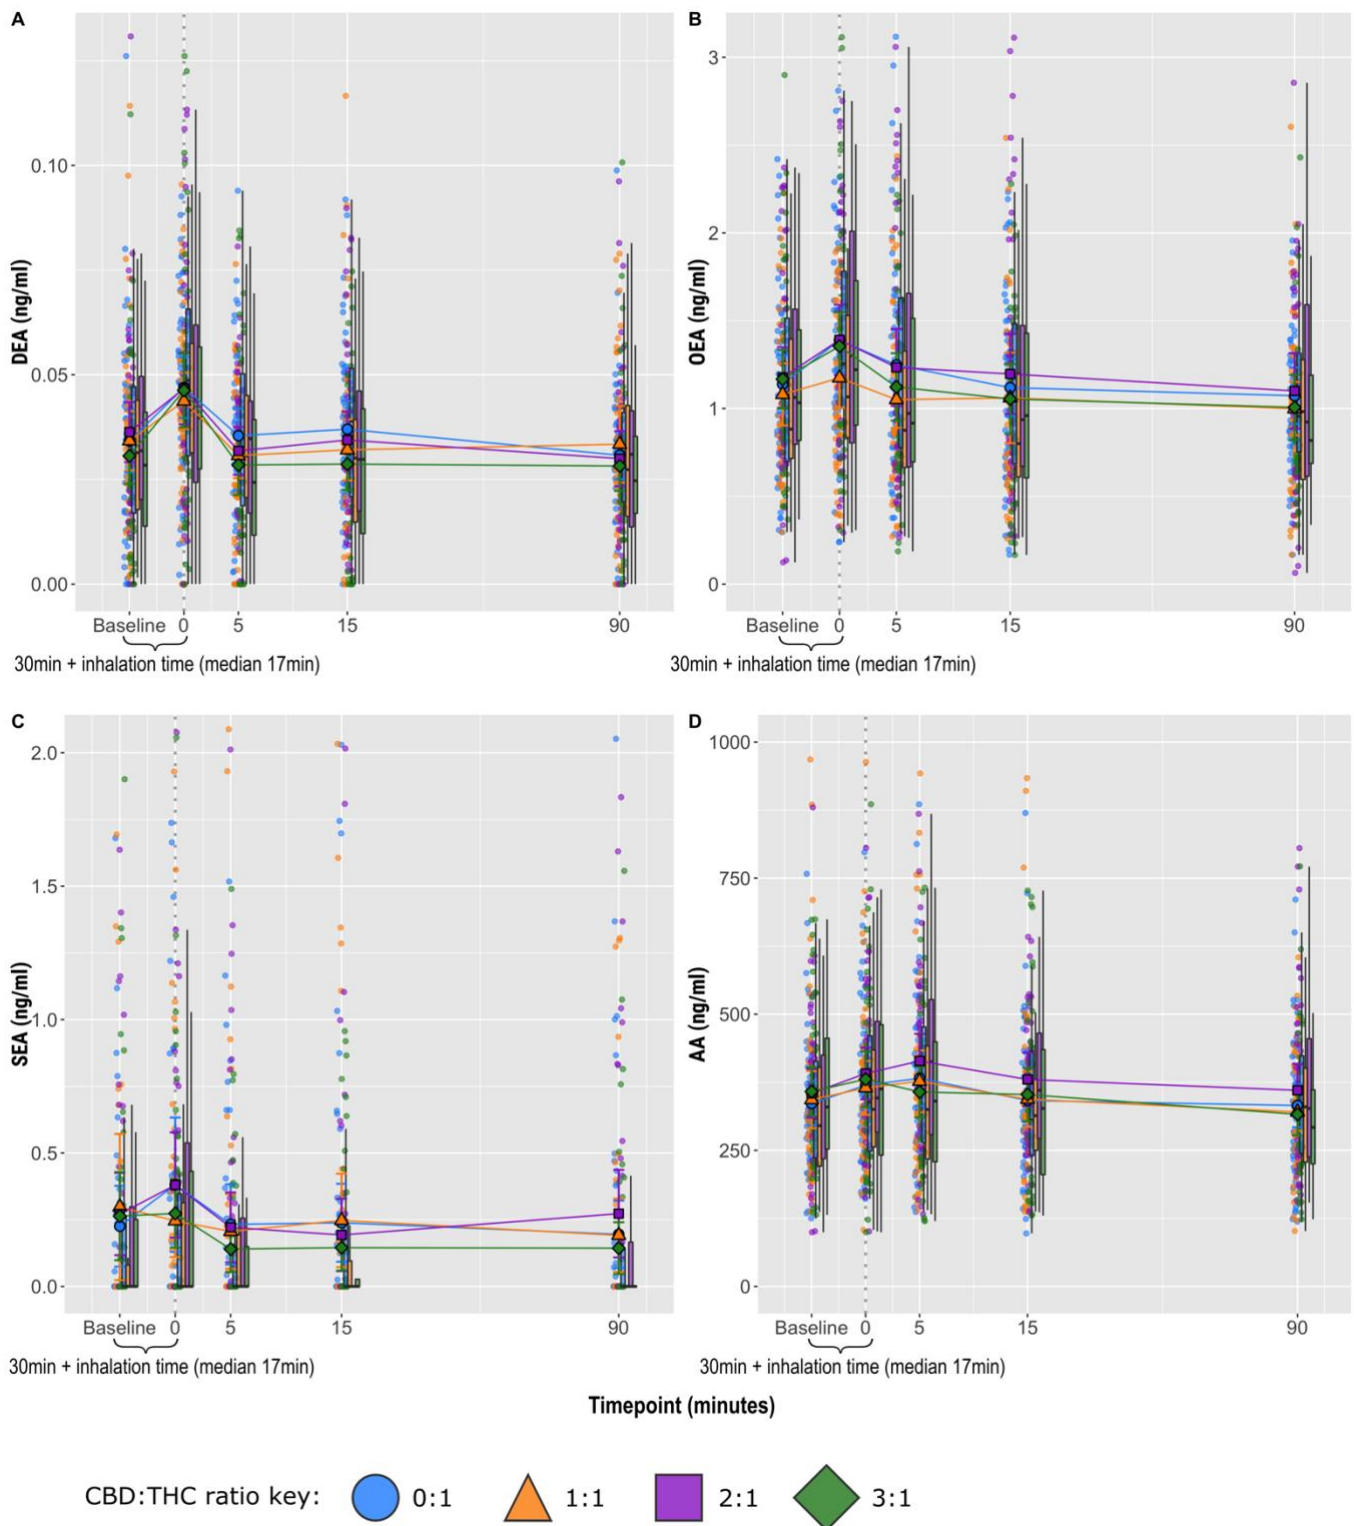

**A.** Docosatetraenylethanolamide (DEA), **B.** oleoylethanolamide (OEA), **C.** stearoylethanolamide (SEA), **D.** arachidonic acid (AA).

Circles show individual data points, larger shapes show mean values and boxplots show median and interquartile range.

*Continued next page.*



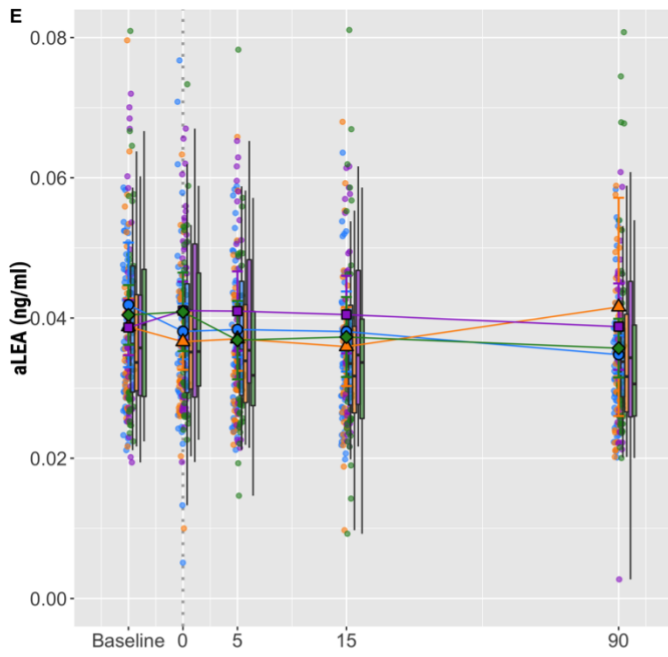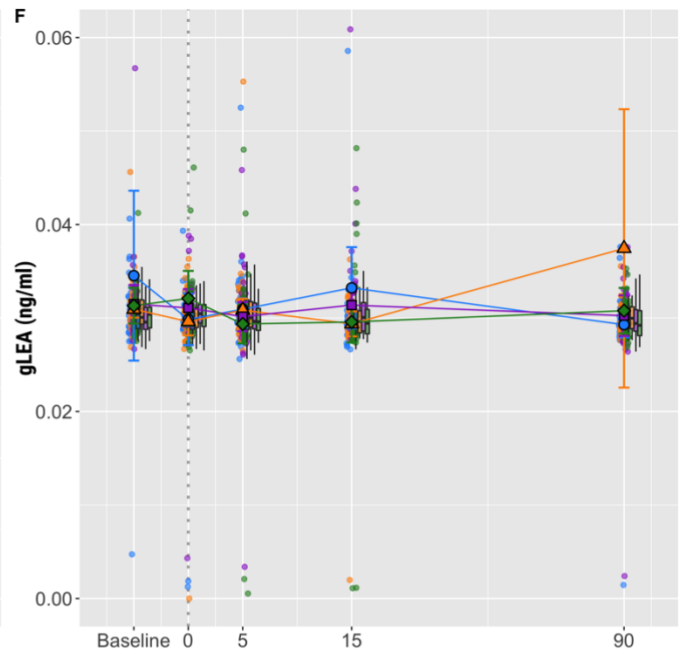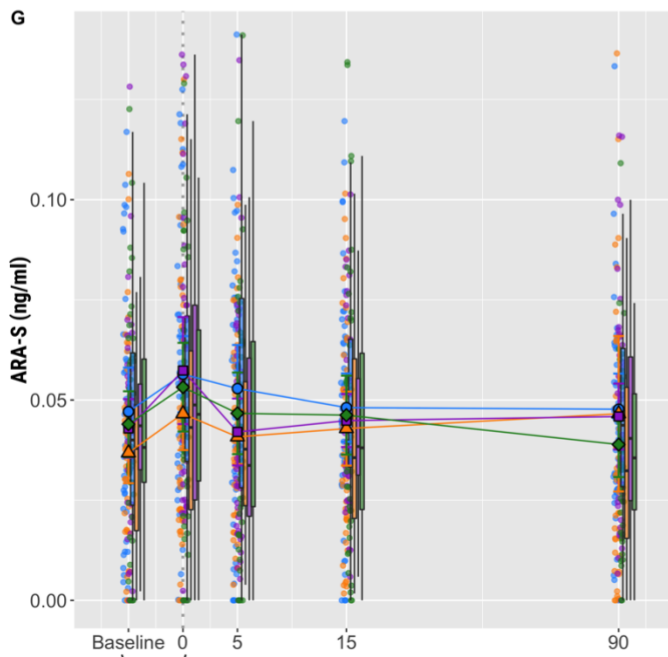

30min + inhalation time (median 17min)

Timepoint (minutes)

**eFigure 3 continued.**

Plasma concentration-time graphs, stratified by CBD:THC ratio.

- E.** alpha-linolenylethanolamide (aLEA),
- F.** gamma-linolenylethanolamide (gLEA),
- G.** N-arachidonoyl-L-serine (ARA-S).

Circles show individual data points, larger shapes show mean values and boxplots show median and interquartile range.

eFigure 4. Plasma concentrations following 10mg THC, 0mg CBD (0:1 ratio).

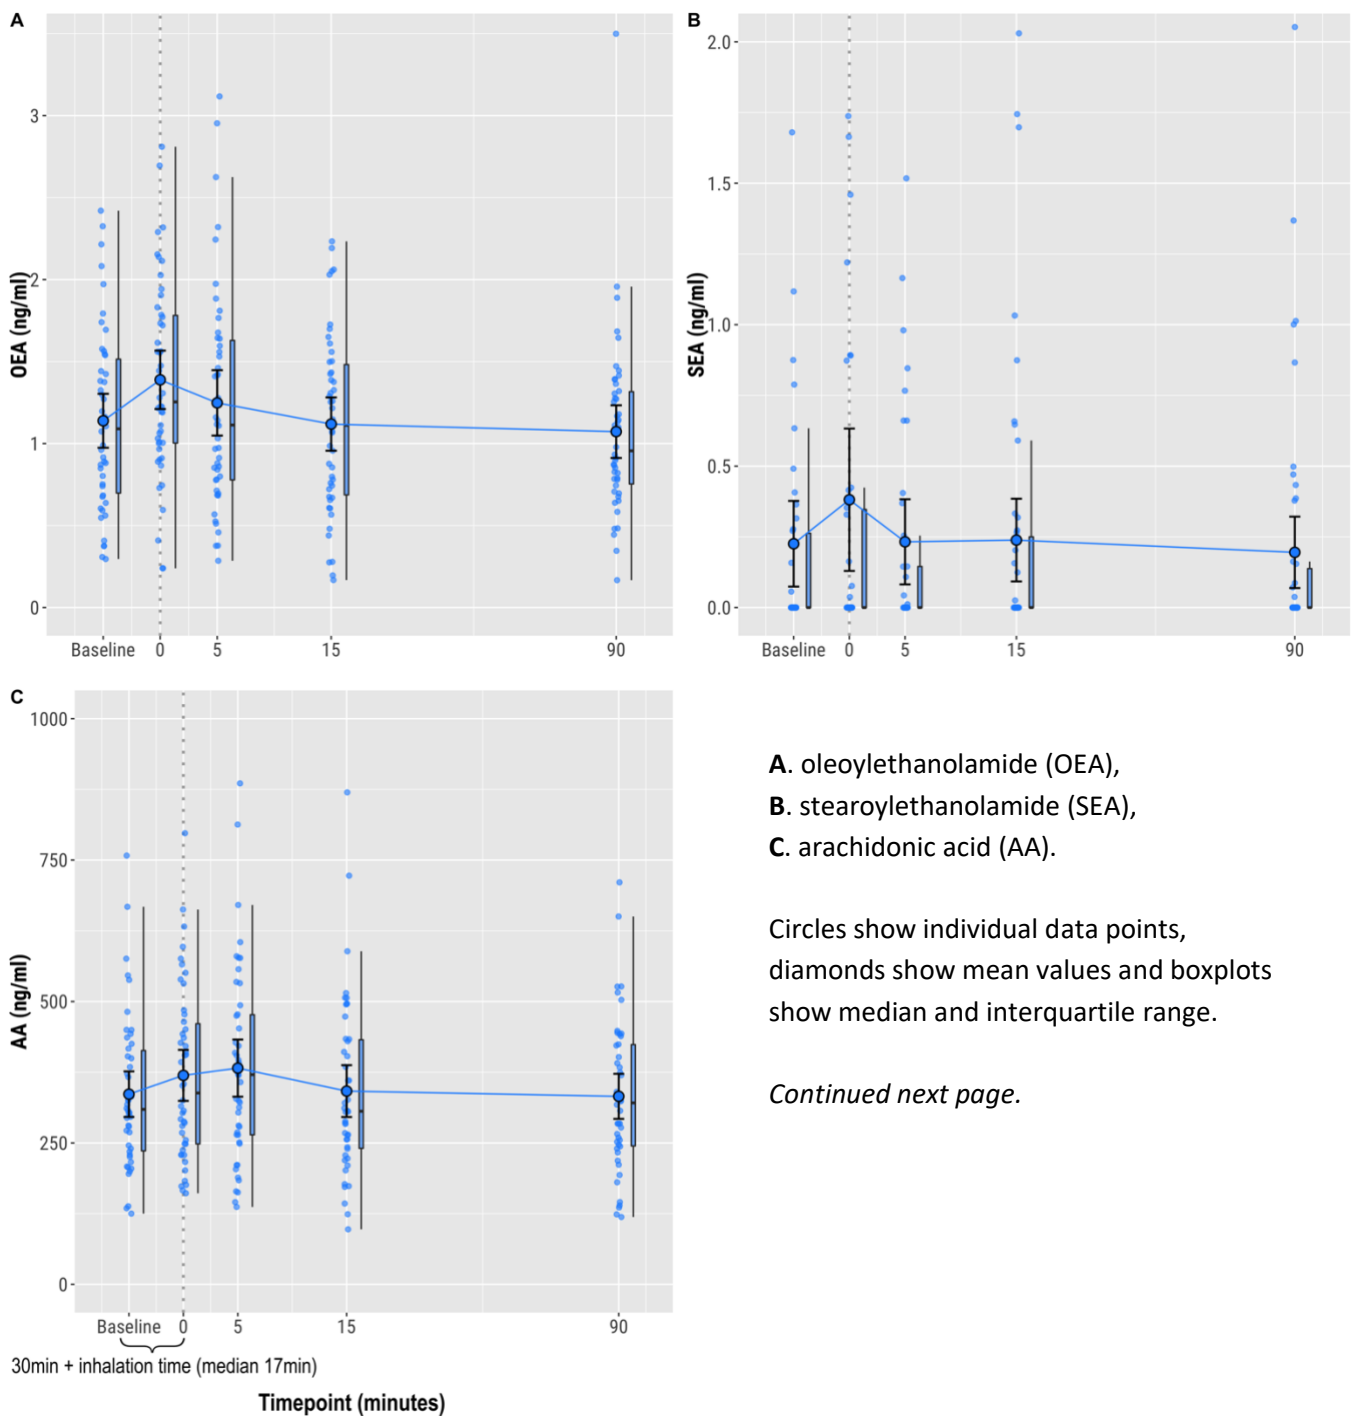

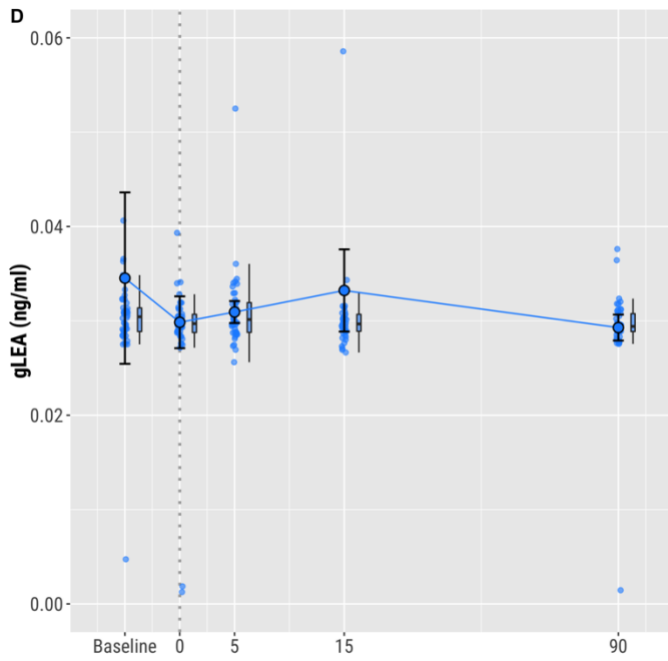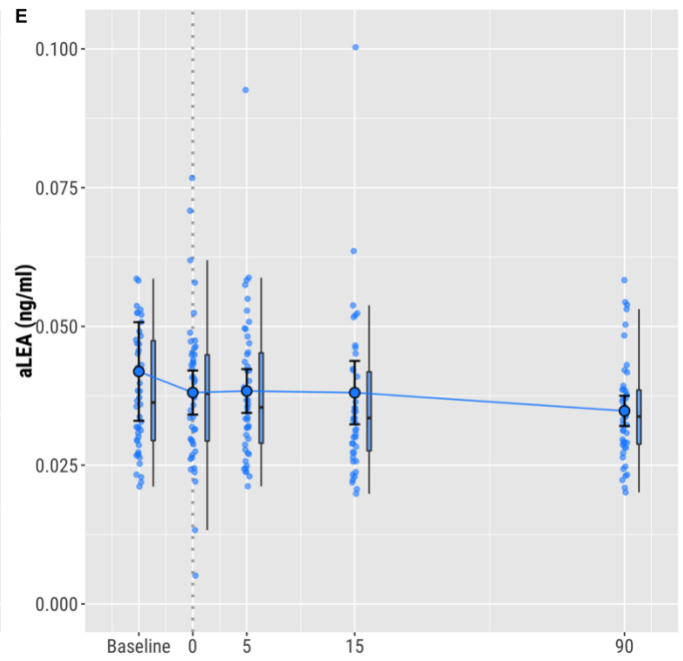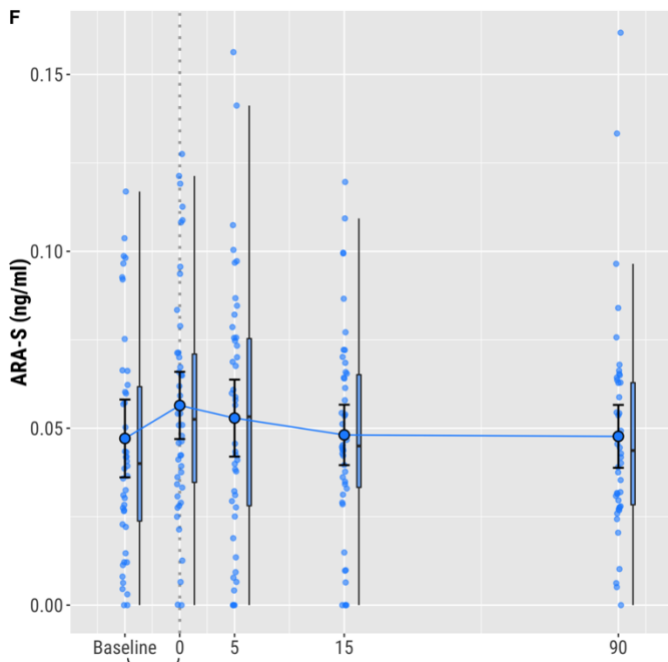

30min + inhalation time (median 17min)

Timepoint (minutes)

**eFigure 4 continued.**

Plasma concentrations following administration of 10mg THC, 0mg CBD (0:1 ratio).

**E.** gamma-linolenylethanolamide (gLEA),  
**F.** alpha-linolenylethanolamide (aLEA),  
**G.** N-arachidonoyl-L-serine (ARA-S).

Circles show individual data points, diamonds show mean values and boxplots show median and interquartile range.

eFigure 5. Pre-inhalation plasma concentrations vs. visit number.

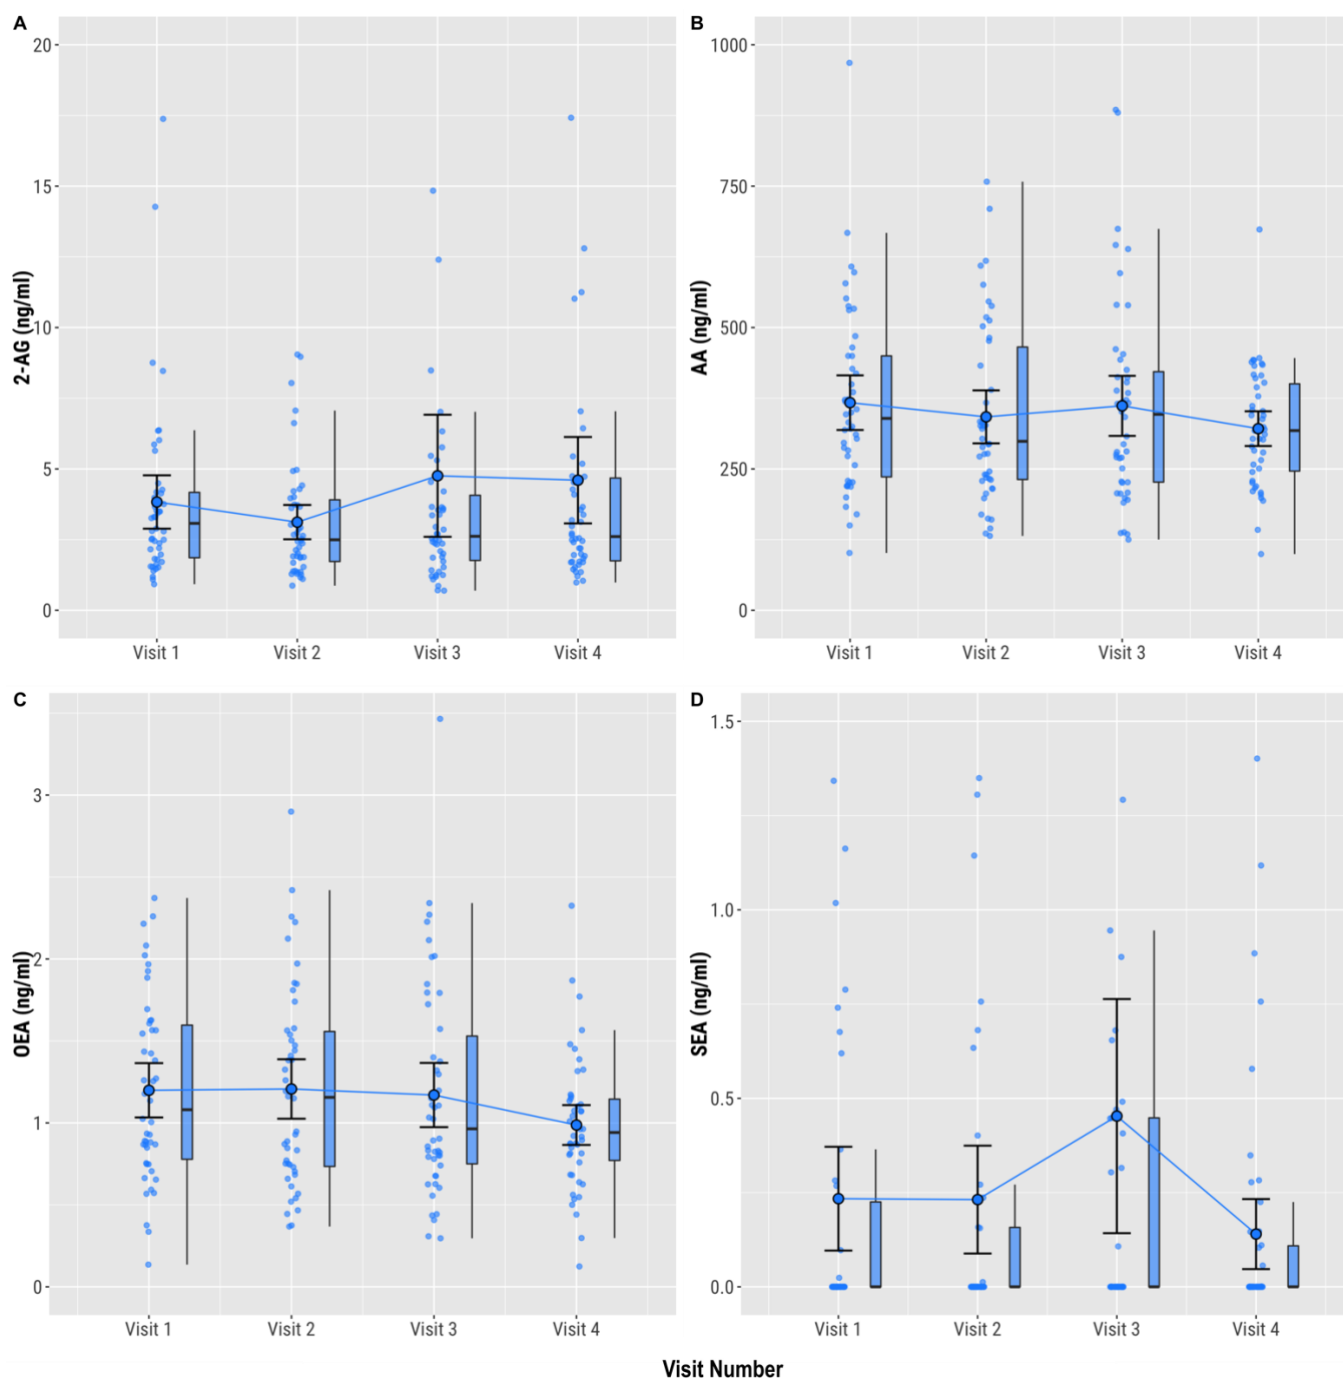

**A.** 2-arachidonoylglycerol (2-AG), **B.** arachidonic acid (AA), **C.** oleoylethanolamide (OEA),  
**D.** stearoylethanolamide (SEA).

Circles show individual data points, diamonds show mean values and boxplots show median and interquartile range.

*Continued next page.*

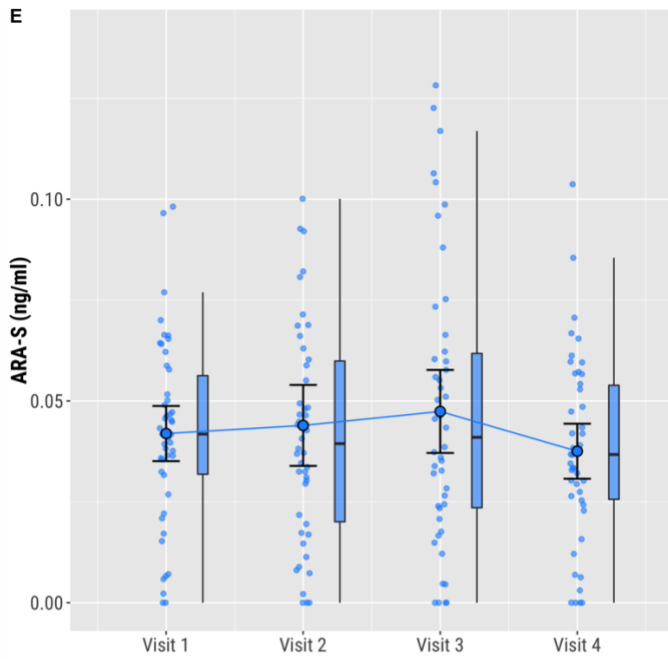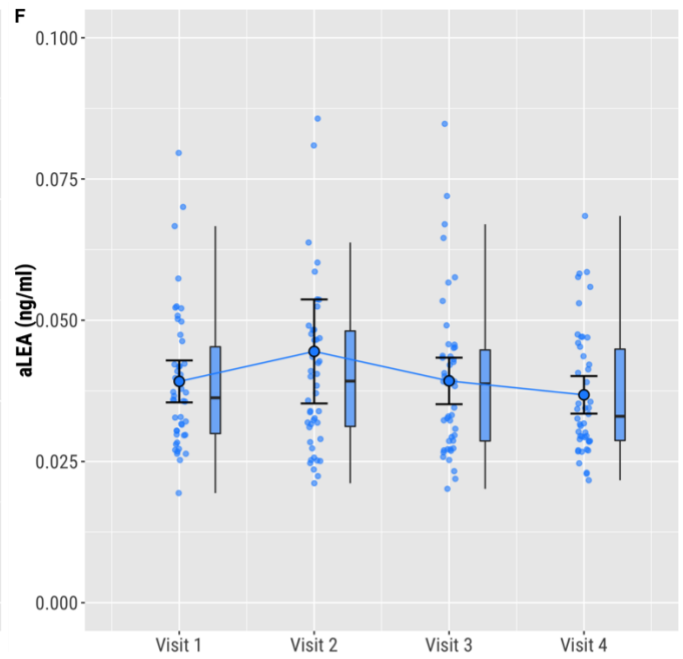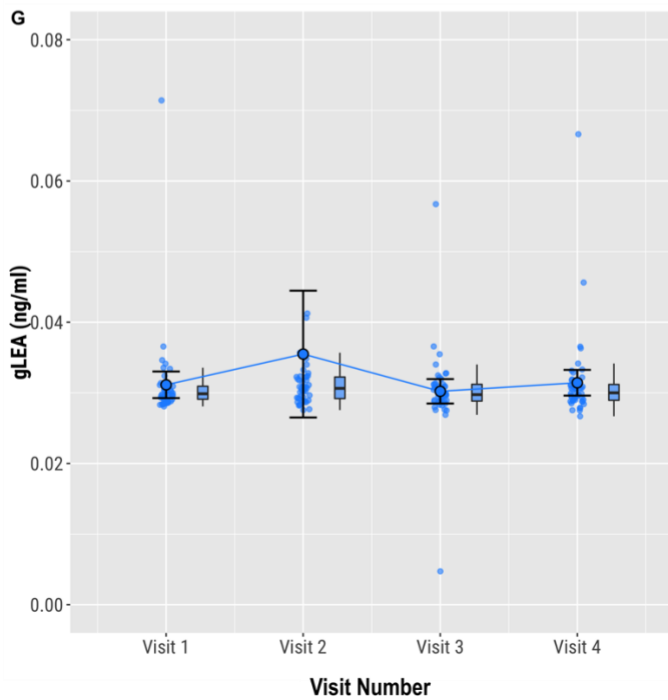

**eFigure 5 continued.**

Pre-inhalation plasma concentrations vs. visit number.

**E.** N-arachidonoyl-L-serine (ARA-S),  
**F.** alpha-linolenylethanolamide (aLEA),  
**G.** gamma-linolenylethanolamide (gLEA).

Circles show individual data points, diamonds show mean values and boxplots show median and interquartile range.

**eTable 1.** Pharmacokinetics for each contrast between CBD:THC ratios – Models 1 and 2

Statistically significant rows are presented in bold.

| <b>Contrast</b>                             | <b>Estimated marginal mean difference</b> | <b>Lower 95% CI</b> | <b>Upper 95% CI</b> | <b>p-value</b> |
|---------------------------------------------|-------------------------------------------|---------------------|---------------------|----------------|
| <b>THC AUC</b>                              |                                           |                     |                     |                |
| 0:1 - 1:1                                   | -15.336                                   | -32.679             | 2.008               | 0.287          |
| 0:1 - 2:1                                   | -6.549                                    | -23.893             | 10.794              | 0.872          |
| 0:1 - 3:1                                   | -7.412                                    | -24.756             | 9.931               | 0.825          |
| 1:1 - 2:1                                   | 8.786                                     | -8.557              | 26.130              | 0.738          |
| 1:1 - 3:1                                   | 7.923                                     | -9.420              | 25.267              | 0.794          |
| 2:1 - 3:1                                   | -0.863                                    | -18.207             | 16.480              | 1.000          |
| <b>THC AUC (adjusted for visit number)</b>  |                                           |                     |                     |                |
| 0:1 - 1:1                                   | -16.038                                   | -33.514             | 1.437               | 0.256          |
| 0:1 - 2:1                                   | -7.112                                    | -24.571             | 10.347              | 0.845          |
| 0:1 - 3:1                                   | -6.943                                    | -24.495             | 10.609              | 0.856          |
| 1:1 - 2:1                                   | 8.927                                     | -8.524              | 26.377              | 0.732          |
| 1:1 - 3:1                                   | 9.095                                     | -8.499              | 26.689              | 0.726          |
| 2:1 - 3:1                                   | 0.169                                     | -17.475             | 17.813              | 1.000          |
| <b>THC Peak</b>                             |                                           |                     |                     |                |
| 0:1 - 1:1                                   | -9.255                                    | -21.379             | 2.869               | 0.418          |
| 0:1 - 2:1                                   | -0.085                                    | -12.209             | 12.039              | 1.000          |
| 0:1 - 3:1                                   | -1.013                                    | -13.137             | 11.111              | 0.998          |
| 1:1 - 2:1                                   | 9.170                                     | -2.954              | 21.294              | 0.426          |
| 1:1 - 3:1                                   | 8.242                                     | -3.882              | 20.366              | 0.521          |
| 2:1 - 3:1                                   | -0.928                                    | -13.052             | 11.196              | 0.999          |
| <b>THC Peak (adjusted for visit number)</b> |                                           |                     |                     |                |
| 0:1 - 1:1                                   | -9.255                                    | -21.843             | 2.631               | 0.418          |
| 0:1 - 2:1                                   | -0.085                                    | -12.508             | 11.944              | 1.000          |
| 0:1 - 3:1                                   | -1.013                                    | -13.449             | 11.132              | 0.998          |
| 1:1 - 2:1                                   | 9.170                                     | -2.896              | 21.544              | 0.426          |
| 1:1 - 3:1                                   | 8.242                                     | -3.872              | 20.768              | 0.521          |
| 2:1 - 3:1                                   | -0.876                                    | -13.232             | 11.479              | 0.999          |

eTable 1 continued.

| Contrast                                    | Estimated marginal mean difference | Lower 95% CI | Upper 95% CI | p-value                 |
|---------------------------------------------|------------------------------------|--------------|--------------|-------------------------|
| <b>CBD AUC</b>                              |                                    |              |              |                         |
| 0:1 - 1:1                                   | -123.709                           | -168.682     | -78.736      | 9.088x10 <sup>-7</sup>  |
| 0:1 - 2:1                                   | -244.322                           | -289.295     | -199.349     | 1.565x10 <sup>-14</sup> |
| 0:1 - 3:1                                   | -345.036                           | -390.009     | -300.063     | <2.22x10 <sup>-16</sup> |
| 1:1 - 2:1                                   | -120.613                           | -165.586     | -75.640      | 1.722x10 <sup>-6</sup>  |
| 1:1 - 3:1                                   | -221.327                           | -266.300     | -176.354     | 2.975x10 <sup>-14</sup> |
| 2:1 - 3:1                                   | -100.714                           | -145.687     | -55.741      | 8.148x10 <sup>-5</sup>  |
| <b>CBD AUC (adjusted for visit number)</b>  |                                    |              |              |                         |
| 0:1 - 1:1                                   | -124.426                           | -169.361     | -79.492      | 7.738x10 <sup>-7</sup>  |
| 0:1 - 2:1                                   | -245.398                           | -290.354     | -200.442     | 8.549x10 <sup>-15</sup> |
| 0:1 - 3:1                                   | -342.526                           | -387.656     | -297.397     | <2.22x10 <sup>-16</sup> |
| 1:1 - 2:1                                   | -120.972                           | -165.893     | -76.050      | 1.570x10 <sup>-6</sup>  |
| 1:1 - 3:1                                   | -218.100                           | -263.368     | -172.833     | 2.431x10 <sup>-14</sup> |
| 2:1 - 3:1                                   | -97.129                            | -142.478     | -51.779      | 1.798x10 <sup>-4</sup>  |
| <b>CBD Peak</b>                             |                                    |              |              |                         |
| 0:1 - 1:1                                   | -61.543                            | -87.712      | -35.374      | 3.197x10 <sup>-5</sup>  |
| 0:1 - 2:1                                   | -109.768                           | -135.936     | -83.599      | 2.828x10 <sup>-13</sup> |
| 0:1 - 3:1                                   | -153.819                           | -179.988     | -127.650     | 1.110x10 <sup>-16</sup> |
| 1:1 - 2:1                                   | -48.225                            | -74.394      | -22.056      | 0.002                   |
| 1:1 - 3:1                                   | -92.277                            | -118.445     | -66.108      | 3.820x10 <sup>-10</sup> |
| 2:1 - 3:1                                   | -44.052                            | -70.221      | -17.883      | 0.005                   |
| <b>CBD Peak (adjusted for visit number)</b> |                                    |              |              |                         |
| 0:1 - 1:1                                   | -61.743                            | -87.989      | -35.496      | 3.200x10 <sup>-5</sup>  |
| 0:1 - 2:1                                   | -110.067                           | -136.327     | -83.808      | 2.964x10 <sup>-13</sup> |
| 0:1 - 3:1                                   | -153.120                           | -179.480     | -126.759     | <2.22x10 <sup>-16</sup> |
| 1:1 - 2:1                                   | -48.325                            | -74.564      | -22.086      | 0.002                   |
| 1:1 - 3:1                                   | -91.377                            | -117.818     | -64.936      | 8.214x10 <sup>-10</sup> |
| 2:1 - 3:1                                   | -43.052                            | -69.541      | -16.563      | 0.007                   |

eTable 1 continued.

| Contrast                                                                                           | Estimated marginal mean difference | Lower 95% CI | Upper 95% CI | p-value |
|----------------------------------------------------------------------------------------------------|------------------------------------|--------------|--------------|---------|
| <b>Anandamide AUC</b>                                                                              |                                    |              |              |         |
| 0:1 - 1:1                                                                                          | 0.007                              | -0.136       | 0.150        | 1.000   |
| 0:1 - 2:1                                                                                          | -0.062                             | -0.206       | 0.081        | 0.825   |
| 0:1 - 3:1                                                                                          | -0.015                             | -0.158       | 0.128        | 0.997   |
| 1:1 - 2:1                                                                                          | -0.069                             | -0.213       | 0.074        | 0.774   |
| 1:1 - 3:1                                                                                          | -0.022                             | -0.165       | 0.121        | 0.991   |
| 2:1 - 3:1                                                                                          | 0.048                              | -0.096       | 0.191        | 0.913   |
| <b>Anandamide AUC (adjusted for baseline concentration, visit number and time between visits)</b>  |                                    |              |              |         |
| 0:1 - 1:1                                                                                          | 0.018                              | -0.098       | 0.134        | 0.990   |
| 0:1 - 2:1                                                                                          | -0.066                             | -0.182       | 0.050        | 0.673   |
| 0:1 - 3:1                                                                                          | 0.007                              | -0.110       | 0.125        | 0.999   |
| 1:1 - 2:1                                                                                          | -0.084                             | -0.200       | 0.033        | 0.487   |
| 1:1 - 3:1                                                                                          | -0.011                             | -0.128       | 0.107        | 0.998   |
| 2:1 - 3:1                                                                                          | 0.073                              | -0.046       | 0.192        | 0.617   |
| <b>Anandamide Peak</b>                                                                             |                                    |              |              |         |
| 0:1 - 1:1                                                                                          | 0.014                              | -0.028       | 0.057        | 0.912   |
| 0:1 - 2:1                                                                                          | -0.009                             | -0.052       | 0.033        | 0.971   |
| 0:1 - 3:1                                                                                          | -0.012                             | -0.055       | 0.030        | 0.942   |
| 1:1 - 2:1                                                                                          | -0.024                             | -0.066       | 0.019        | 0.690   |
| 1:1 - 3:1                                                                                          | -0.026                             | -0.069       | 0.016        | 0.612   |
| 2:1 - 3:1                                                                                          | -0.003                             | -0.045       | 0.040        | 0.999   |
| <b>Anandamide Peak (adjusted for baseline concentration, visit number and time between visits)</b> |                                    |              |              |         |
| 0:1 - 1:1                                                                                          | 0.013                              | -0.029       | 0.055        | 0.927   |
| 0:1 - 2:1                                                                                          | -0.010                             | -0.052       | 0.031        | 0.962   |
| 0:1 - 3:1                                                                                          | -0.005                             | -0.047       | 0.037        | 0.995   |
| 1:1 - 2:1                                                                                          | -0.023                             | -0.065       | 0.019        | 0.692   |
| 1:1 - 3:1                                                                                          | -0.018                             | -0.060       | 0.024        | 0.828   |
| 2:1 - 3:1                                                                                          | 0.005                              | -0.038       | 0.048        | 0.996   |



eTable 1 continued.

| Contrast                                                                                     | Estimated marginal mean difference | Lower 95% CI | Upper 95% CI | p-value |
|----------------------------------------------------------------------------------------------|------------------------------------|--------------|--------------|---------|
| <b>2-AG AUC</b>                                                                              |                                    |              |              |         |
| 0:1 - 1:1                                                                                    | -3.214                             | -11.042      | 4.613        | 0.849   |
| 0:1 - 2:1                                                                                    | -4.005                             | -11.833      | 3.822        | 0.743   |
| 0:1 - 3:1                                                                                    | -1.337                             | -9.164       | 6.491        | 0.987   |
| 1:1 - 2:1                                                                                    | -0.791                             | -8.619       | 7.037        | 0.997   |
| 1:1 - 3:1                                                                                    | 1.878                              | -5.950       | 9.705        | 0.965   |
| 2:1 - 3:1                                                                                    | 2.669                              | -5.159       | 10.496       | 0.907   |
| <b>2-AG AUC (adjusted for baseline concentration, visit number and time between visits)</b>  |                                    |              |              |         |
| 0:1 - 1:1                                                                                    | 1.068                              | -2.526       | 4.662        | 0.936   |
| 0:1 - 2:1                                                                                    | 0.189                              | -3.391       | 3.770        | 1.000   |
| 0:1 - 3:1                                                                                    | 3.068                              | -0.567       | 6.702        | 0.344   |
| 1:1 - 2:1                                                                                    | -0.879                             | -4.467       | 2.709        | 0.962   |
| 1:1 - 3:1                                                                                    | 1.999                              | -1.611       | 5.610        | 0.693   |
| 2:1 - 3:1                                                                                    | 2.879                              | -0.784       | 6.541        | 0.408   |
| <b>2-AG Peak</b>                                                                             |                                    |              |              |         |
| 0:1 - 1:1                                                                                    | -1.656                             | -4.555       | 1.243        | 0.672   |
| 0:1 - 2:1                                                                                    | 1.120                              | -1.778       | 4.018        | 0.870   |
| 0:1 - 3:1                                                                                    | 0.463                              | -2.435       | 3.361        | 0.989   |
| 1:1 - 2:1                                                                                    | 2.776                              | -0.108       | 5.661        | 0.231   |
| 1:1 - 3:1                                                                                    | 2.119                              | -0.765       | 5.004        | 0.469   |
| 2:1 - 3:1                                                                                    | -0.657                             | -3.541       | 2.227        | 0.969   |
| <b>2-AG Peak (adjusted for baseline concentration, visit number and time between visits)</b> |                                    |              |              |         |
| 0:1 - 1:1                                                                                    | -1.711                             | -4.620       | 1.199        | 0.651   |
| 0:1 - 2:1                                                                                    | 1.141                              | -1.758       | 4.041        | 0.864   |
| 0:1 - 3:1                                                                                    | 0.180                              | -2.762       | 3.123        | 0.999   |
| 1:1 - 2:1                                                                                    | 2.852                              | -0.053       | 5.757        | 0.216   |
| 1:1 - 3:1                                                                                    | 1.891                              | -1.033       | 4.815        | 0.578   |
| 2:1 - 3:1                                                                                    | -0.961                             | -3.923       | 2.000        | 0.918   |

eTable 1 continued.

| Contrast                                                                                                 | Estimated marginal mean difference | Lower 95% CI | Upper 95% CI | p-value |
|----------------------------------------------------------------------------------------------------------|------------------------------------|--------------|--------------|---------|
| <b>Arachidonic acid AUC</b>                                                                              |                                    |              |              |         |
| 0:1 - 1:1                                                                                                | 36.986                             | -148.669     | 222.642      | 0.979   |
| 0:1 - 2:1                                                                                                | -42.727                            | -228.383     | 142.929      | 0.969   |
| 0:1 - 3:1                                                                                                | 83.001                             | -102.655     | 268.657      | 0.813   |
| 1:1 - 2:1                                                                                                | -79.713                            | -265.369     | 105.942      | 0.831   |
| 1:1 - 3:1                                                                                                | 46.015                             | -139.641     | 231.670      | 0.961   |
| 2:1 - 3:1                                                                                                | 125.728                            | -59.928      | 311.384      | 0.540   |
| <b>Arachidonic acid AUC (adjusted for baseline concentration, visit number and time between visits)</b>  |                                    |              |              |         |
| 0:1 - 1:1                                                                                                | 17.069                             | -132.965     | 167.104      | 0.996   |
| 0:1 - 2:1                                                                                                | -68.190                            | -217.688     | 81.309       | 0.804   |
| 0:1 - 3:1                                                                                                | 29.306                             | -123.244     | 181.856      | 0.981   |
| 1:1 - 2:1                                                                                                | -85.259                            | -235.767     | 65.250       | 0.677   |
| 1:1 - 3:1                                                                                                | 12.237                             | -139.517     | 163.990      | 0.999   |
| 2:1 - 3:1                                                                                                | 97.495                             | -56.136      | 251.127      | 0.593   |
| <b>Arachidonic acid Peak</b>                                                                             |                                    |              |              |         |
| 0:1 - 1:1                                                                                                | 9.139                              | -48.117      | 66.395       | 0.989   |
| 0:1 - 2:1                                                                                                | -21.807                            | -79.118      | 35.503       | 0.875   |
| 0:1 - 3:1                                                                                                | 36.819                             | -20.516      | 94.154       | 0.584   |
| 1:1 - 2:1                                                                                                | -30.946                            | -88.219      | 26.327       | 0.709   |
| 1:1 - 3:1                                                                                                | 27.680                             | -29.609      | 84.970       | 0.775   |
| 2:1 - 3:1                                                                                                | 58.626                             | 1.377        | 115.876      | 0.184   |
| <b>Arachidonic acid Peak (adjusted for baseline concentration, visit number and time between visits)</b> |                                    |              |              |         |
| 0:1 - 1:1                                                                                                | 8.911                              | -48.980      | 66.802       | 0.990   |
| 0:1 - 2:1                                                                                                | -19.579                            | -77.275      | 38.118       | 0.908   |
| 0:1 - 3:1                                                                                                | 33.525                             | -25.289      | 92.339       | 0.673   |
| 1:1 - 2:1                                                                                                | -28.489                            | -86.536      | 29.557       | 0.766   |
| 1:1 - 3:1                                                                                                | 24.614                             | -33.931      | 83.160       | 0.839   |
| 2:1 - 3:1                                                                                                | 53.103                             | -6.114       | 112.321      | 0.291   |

eTable 1 continued.

| Contrast                                                                                    | Estimated marginal mean difference | Lower 95% CI | Upper 95% CI | p-value |
|---------------------------------------------------------------------------------------------|------------------------------------|--------------|--------------|---------|
| <b>DEA AUC</b>                                                                              |                                    |              |              |         |
| 0:1 - 1:1                                                                                   | 0.013                              | -0.020       | 0.045        | 0.864   |
| 0:1 - 2:1                                                                                   | 0.014                              | -0.018       | 0.047        | 0.814   |
| 0:1 - 3:1                                                                                   | 0.005                              | -0.027       | 0.037        | 0.990   |
| 1:1 - 2:1                                                                                   | 0.002                              | -0.031       | 0.034        | 1.000   |
| 1:1 - 3:1                                                                                   | -0.008                             | -0.040       | 0.025        | 0.965   |
| 2:1 - 3:1                                                                                   | -0.009                             | -0.042       | 0.023        | 0.938   |
| <b>DEA AUC (adjusted for baseline concentration, visit number and time between visits)</b>  |                                    |              |              |         |
| 0:1 - 1:1                                                                                   | 0.013                              | -0.006       | 0.031        | 0.535   |
| 0:1 - 2:1                                                                                   | 0.009                              | -0.010       | 0.027        | 0.785   |
| 0:1 - 3:1                                                                                   | 0.015                              | -0.004       | 0.034        | 0.393   |
| 1:1 - 2:1                                                                                   | -0.004                             | -0.023       | 0.015        | 0.976   |
| 1:1 - 3:1                                                                                   | 0.002                              | -0.016       | 0.021        | 0.994   |
| 2:1 - 3:1                                                                                   | 0.006                              | -0.013       | 0.025        | 0.915   |
| <b>DEA Peak</b>                                                                             |                                    |              |              |         |
| 0:1 - 1:1                                                                                   | 0.003                              | -0.006       | 0.012        | 0.894   |
| 0:1 - 2:1                                                                                   | 0.001                              | -0.008       | 0.010        | 0.998   |
| 0:1 - 3:1                                                                                   | 0.000                              | -0.009       | 0.009        | 1.000   |
| 1:1 - 2:1                                                                                   | -0.002                             | -0.011       | 0.007        | 0.952   |
| 1:1 - 3:1                                                                                   | -0.004                             | -0.013       | 0.006        | 0.867   |
| 2:1 - 3:1                                                                                   | -0.001                             | -0.010       | 0.008        | 0.995   |
| <b>DEA Peak (adjusted for baseline concentration, visit number and time between visits)</b> |                                    |              |              |         |
| 0:1 - 1:1                                                                                   | 0.004                              | -0.005       | 0.013        | 0.848   |
| 0:1 - 2:1                                                                                   | 0.001                              | -0.008       | 0.010        | 0.998   |
| 0:1 - 3:1                                                                                   | 0.002                              | -0.008       | 0.011        | 0.987   |
| 1:1 - 2:1                                                                                   | -0.003                             | -0.012       | 0.006        | 0.926   |
| 1:1 - 3:1                                                                                   | -0.002                             | -0.011       | 0.007        | 0.966   |
| 2:1 - 3:1                                                                                   | 0.001                              | -0.009       | 0.010        | 0.999   |

eTable 1 continued.

| Contrast                                                                                    | Estimated marginal mean difference | Lower 95% CI | Upper 95% CI | p-value |
|---------------------------------------------------------------------------------------------|------------------------------------|--------------|--------------|---------|
| <b>OEA AUC</b>                                                                              |                                    |              |              |         |
| 0:1 - 1:1                                                                                   | 0.312                              | -0.469       | 1.093        | 0.859   |
| 0:1 - 2:1                                                                                   | 0.048                              | -0.733       | 0.829        | 0.999   |
| 0:1 - 3:1                                                                                   | 0.357                              | -0.424       | 1.138        | 0.802   |
| 1:1 - 2:1                                                                                   | -0.264                             | -1.045       | 0.517        | 0.908   |
| 1:1 - 3:1                                                                                   | 0.045                              | -0.736       | 0.826        | 0.999   |
| 2:1 - 3:1                                                                                   | 0.310                              | -0.471       | 1.091        | 0.861   |
| <b>OEA AUC (adjusted for baseline concentration, visit number and time between visits)</b>  |                                    |              |              |         |
| 0:1 - 1:1                                                                                   | 0.412                              | -0.242       | 1.066        | 0.599   |
| 0:1 - 2:1                                                                                   | -0.008                             | -0.659       | 0.643        | 1.000   |
| 0:1 - 3:1                                                                                   | 0.264                              | -0.398       | 0.927        | 0.859   |
| 1:1 - 2:1                                                                                   | -0.420                             | -1.078       | 0.237        | 0.587   |
| 1:1 - 3:1                                                                                   | -0.148                             | -0.809       | 0.514        | 0.971   |
| 2:1 - 3:1                                                                                   | 0.273                              | -0.396       | 0.941        | 0.851   |
| <b>OEA Peak</b>                                                                             |                                    |              |              |         |
| 0:1 - 1:1                                                                                   | 0.188                              | -0.028       | 0.405        | 0.315   |
| 0:1 - 2:1                                                                                   | 0.015                              | -0.201       | 0.231        | 0.999   |
| 0:1 - 3:1                                                                                   | 0.047                              | -0.169       | 0.263        | 0.974   |
| 1:1 - 2:1                                                                                   | -0.174                             | -0.390       | 0.043        | 0.390   |
| 1:1 - 3:1                                                                                   | -0.142                             | -0.358       | 0.075        | 0.568   |
| 2:1 - 3:1                                                                                   | 0.032                              | -0.184       | 0.248        | 0.991   |
| <b>OEA Peak (adjusted for baseline concentration, visit number and time between visits)</b> |                                    |              |              |         |
| 0:1 - 1:1                                                                                   | 0.192                              | -0.028       | 0.412        | 0.312   |
| 0:1 - 2:1                                                                                   | 0.019                              | -0.200       | 0.237        | 0.998   |
| 0:1 - 3:1                                                                                   | 0.059                              | -0.163       | 0.281        | 0.954   |
| 1:1 - 2:1                                                                                   | -0.173                             | -0.394       | 0.048        | 0.410   |
| 1:1 - 3:1                                                                                   | -0.133                             | -0.355       | 0.089        | 0.635   |
| 2:1 - 3:1                                                                                   | 0.040                              | -0.184       | 0.264        | 0.985   |

eTable 1 continued.

| Contrast                                                                                    | Estimated marginal mean difference | Lower 95% CI | Upper 95% CI | p-value |
|---------------------------------------------------------------------------------------------|------------------------------------|--------------|--------------|---------|
| <b>SEA AUC</b>                                                                              |                                    |              |              |         |
| 0:1 - 1:1                                                                                   | 0.431                              | -0.583       | 1.445        | 0.835   |
| 0:1 - 2:1                                                                                   | 0.198                              | -0.815       | 1.212        | 0.980   |
| 0:1 - 3:1                                                                                   | 0.472                              | -0.541       | 1.486        | 0.793   |
| 1:1 - 2:1                                                                                   | -0.233                             | -1.246       | 0.781        | 0.969   |
| 1:1 - 3:1                                                                                   | 0.041                              | -0.972       | 1.055        | 1.000   |
| 2:1 - 3:1                                                                                   | 0.274                              | -0.740       | 1.288        | 0.951   |
| <b>SEA AUC (adjusted for baseline concentration, visit number and time between visits)</b>  |                                    |              |              |         |
| 0:1 - 1:1                                                                                   | 0.164                              | -0.252       | 0.581        | 0.863   |
| 0:1 - 2:1                                                                                   | 0.056                              | -0.358       | 0.471        | 0.993   |
| 0:1 - 3:1                                                                                   | 0.295                              | -0.125       | 0.716        | 0.509   |
| 1:1 - 2:1                                                                                   | -0.108                             | -0.525       | 0.309        | 0.956   |
| 1:1 - 3:1                                                                                   | 0.131                              | -0.289       | 0.551        | 0.927   |
| 2:1 - 3:1                                                                                   | 0.239                              | -0.186       | 0.664        | 0.682   |
| <b>SEA Peak</b>                                                                             |                                    |              |              |         |
| 0:1 - 1:1                                                                                   | 0.139                              | -0.114       | 0.392        | 0.700   |
| 0:1 - 2:1                                                                                   | 0.003                              | -0.250       | 0.256        | 1.000   |
| 0:1 - 3:1                                                                                   | 0.109                              | -0.144       | 0.363        | 0.828   |
| 1:1 - 2:1                                                                                   | -0.136                             | -0.389       | 0.118        | 0.715   |
| 1:1 - 3:1                                                                                   | -0.029                             | -0.282       | 0.224        | 0.996   |
| 2:1 - 3:1                                                                                   | 0.106                              | -0.147       | 0.359        | 0.840   |
| <b>SEA Peak (adjusted for baseline concentration, visit number and time between visits)</b> |                                    |              |              |         |
| 0:1 - 1:1                                                                                   | 0.142                              | -0.115       | 0.398        | 0.694   |
| 0:1 - 2:1                                                                                   | 0.013                              | -0.242       | 0.268        | 1.000   |
| 0:1 - 3:1                                                                                   | 0.103                              | -0.156       | 0.362        | 0.861   |
| 1:1 - 2:1                                                                                   | -0.129                             | -0.386       | 0.128        | 0.754   |
| 1:1 - 3:1                                                                                   | -0.039                             | -0.298       | 0.220        | 0.991   |
| 2:1 - 3:1                                                                                   | 0.090                              | -0.172       | 0.351        | 0.905   |

eTable 1 continued.

| Contrast                                                                                      | Estimated marginal mean difference | Lower 95% CI | Upper 95% CI | p-value |
|-----------------------------------------------------------------------------------------------|------------------------------------|--------------|--------------|---------|
| <b>ARA-S AUC</b>                                                                              |                                    |              |              |         |
| 0:1 - 1:1                                                                                     | -0.008                             | -0.053       | 0.036        | 0.983   |
| 0:1 - 2:1                                                                                     | -0.002                             | -0.046       | 0.043        | 1.000   |
| 0:1 - 3:1                                                                                     | 0.004                              | -0.041       | 0.048        | 0.998   |
| 1:1 - 2:1                                                                                     | 0.007                              | -0.038       | 0.051        | 0.991   |
| 1:1 - 3:1                                                                                     | 0.012                              | -0.032       | 0.056        | 0.951   |
| 2:1 - 3:1                                                                                     | 0.005                              | -0.039       | 0.050        | 0.995   |
| <b>ARA-S AUC (adjusted for baseline concentration, visit number and time between visits)</b>  |                                    |              |              |         |
| 0:1 - 1:1                                                                                     | 0.023                              | -0.004       | 0.050        | 0.352   |
| 0:1 - 2:1                                                                                     | 0.011                              | -0.016       | 0.038        | 0.838   |
| 0:1 - 3:1                                                                                     | 0.014                              | -0.013       | 0.042        | 0.723   |
| 1:1 - 2:1                                                                                     | -0.011                             | -0.039       | 0.016        | 0.839   |
| 1:1 - 3:1                                                                                     | -0.008                             | -0.036       | 0.019        | 0.932   |
| 2:1 - 3:1                                                                                     | 0.003                              | -0.025       | 0.031        | 0.996   |
| <b>ARA-S Peak</b>                                                                             |                                    |              |              |         |
| 0:1 - 1:1                                                                                     | 0.007                              | -0.007       | 0.021        | 0.758   |
| 0:1 - 2:1                                                                                     | -0.002                             | -0.016       | 0.012        | 0.991   |
| 0:1 - 3:1                                                                                     | 0.002                              | -0.012       | 0.016        | 0.987   |
| 1:1 - 2:1                                                                                     | -0.009                             | -0.023       | 0.005        | 0.575   |
| 1:1 - 3:1                                                                                     | -0.005                             | -0.019       | 0.009        | 0.913   |
| 2:1 - 3:1                                                                                     | 0.004                              | -0.010       | 0.018        | 0.923   |
| <b>ARA-S Peak (adjusted for baseline concentration, visit number and time between visits)</b> |                                    |              |              |         |
| 0:1 - 1:1                                                                                     | 0.007                              | -0.007       | 0.021        | 0.764   |
| 0:1 - 2:1                                                                                     | -0.002                             | -0.017       | 0.012        | 0.986   |
| 0:1 - 3:1                                                                                     | 0.004                              | -0.011       | 0.018        | 0.957   |
| 1:1 - 2:1                                                                                     | -0.009                             | -0.024       | 0.005        | 0.554   |
| 1:1 - 3:1                                                                                     | -0.003                             | -0.018       | 0.011        | 0.968   |
| 2:1 - 3:1                                                                                     | 0.006                              | -0.008       | 0.021        | 0.836   |

eTable 1 continued.

| Contrast                                                                                     | Estimated marginal mean difference | Lower 95% CI | Upper 95% CI | p-value |
|----------------------------------------------------------------------------------------------|------------------------------------|--------------|--------------|---------|
| <b>aLEA AUC</b>                                                                              |                                    |              |              |         |
| 0:1 - 1:1                                                                                    | -0.009                             | -0.038       | 0.021        | 0.939   |
| 0:1 - 2:1                                                                                    | -0.022                             | -0.051       | 0.007        | 0.457   |
| 0:1 - 3:1                                                                                    | -0.006                             | -0.036       | 0.023        | 0.972   |
| 1:1 - 2:1                                                                                    | -0.013                             | -0.043       | 0.016        | 0.808   |
| 1:1 - 3:1                                                                                    | 0.002                              | -0.027       | 0.031        | 0.999   |
| 2:1 - 3:1                                                                                    | 0.015                              | -0.014       | 0.045        | 0.728   |
| <b>aLEA AUC (adjusted for baseline concentration, visit number and time between visits)</b>  |                                    |              |              |         |
| 0:1 - 1:1                                                                                    | 0.001                              | -0.017       | 0.019        | 1.000   |
| 0:1 - 2:1                                                                                    | -0.012                             | -0.029       | 0.006        | 0.554   |
| 0:1 - 3:1                                                                                    | -0.003                             | -0.021       | 0.015        | 0.985   |
| 1:1 - 2:1                                                                                    | -0.013                             | -0.030       | 0.005        | 0.492   |
| 1:1 - 3:1                                                                                    | -0.004                             | -0.022       | 0.014        | 0.968   |
| 2:1 - 3:1                                                                                    | 0.009                              | -0.010       | 0.027        | 0.787   |
| <b>aLEA Peak</b>                                                                             |                                    |              |              |         |
| 0:1 - 1:1                                                                                    | 0.001                              | -0.005       | 0.007        | 0.990   |
| 0:1 - 2:1                                                                                    | -0.004                             | -0.009       | 0.002        | 0.626   |
| 0:1 - 3:1                                                                                    | -0.003                             | -0.009       | 0.003        | 0.726   |
| 1:1 - 2:1                                                                                    | -0.004                             | -0.010       | 0.001        | 0.432   |
| 1:1 - 3:1                                                                                    | -0.004                             | -0.010       | 0.002        | 0.535   |
| 2:1 - 3:1                                                                                    | 0.000                              | -0.005       | 0.006        | 0.998   |
| <b>aLEA Peak (adjusted for baseline concentration, visit number and time between visits)</b> |                                    |              |              |         |
| 0:1 - 1:1                                                                                    | 0.001                              | -0.005       | 0.007        | 0.982   |
| 0:1 - 2:1                                                                                    | -0.003                             | -0.009       | 0.002        | 0.652   |
| 0:1 - 3:1                                                                                    | -0.003                             | -0.009       | 0.003        | 0.765   |
| 1:1 - 2:1                                                                                    | -0.005                             | -0.011       | 0.001        | 0.424   |
| 1:1 - 3:1                                                                                    | -0.004                             | -0.010       | 0.002        | 0.537   |
| 2:1 - 3:1                                                                                    | 0.001                              | -0.006       | 0.007        | 0.998   |

eTable 1 continued.

| Contrast                                                                                     | Estimated marginal mean difference | Lower 95% CI | Upper 95% CI | p-value |
|----------------------------------------------------------------------------------------------|------------------------------------|--------------|--------------|---------|
| <b>gLEA AUC</b>                                                                              |                                    |              |              |         |
| 0:1 - 1:1                                                                                    | -0.011                             | -0.037       | 0.014        | 0.810   |
| 0:1 - 2:1                                                                                    | -0.010                             | -0.035       | 0.015        | 0.866   |
| 0:1 - 3:1                                                                                    | -0.009                             | -0.034       | 0.016        | 0.892   |
| 1:1 - 2:1                                                                                    | 0.001                              | -0.024       | 0.027        | 0.999   |
| 1:1 - 3:1                                                                                    | 0.002                              | -0.023       | 0.028        | 0.998   |
| 2:1 - 3:1                                                                                    | 0.001                              | -0.024       | 0.026        | 1.000   |
| <b>gLEA AUC (adjusted for baseline concentration, visit number and time between visits)</b>  |                                    |              |              |         |
| 0:1 - 1:1                                                                                    | 0.002                              | -0.006       | 0.009        | 0.963   |
| 0:1 - 2:1                                                                                    | 0.001                              | -0.006       | 0.009        | 0.979   |
| 0:1 - 3:1                                                                                    | 0.002                              | -0.006       | 0.009        | 0.974   |
| 1:1 - 2:1                                                                                    | 0.000                              | -0.008       | 0.007        | 1.000   |
| 1:1 - 3:1                                                                                    | 0.000                              | -0.008       | 0.007        | 1.000   |
| 2:1 - 3:1                                                                                    | 0.000                              | -0.008       | 0.008        | 1.000   |
| <b>gLEA Peak</b>                                                                             |                                    |              |              |         |
| 0:1 - 1:1                                                                                    | 0.000                              | -0.002       | 0.002        | 1.000   |
| 0:1 - 2:1                                                                                    | 0.001                              | -0.001       | 0.003        | 0.886   |
| 0:1 - 3:1                                                                                    | 0.002                              | -0.001       | 0.004        | 0.452   |
| 1:1 - 2:1                                                                                    | 0.001                              | -0.001       | 0.003        | 0.907   |
| 1:1 - 3:1                                                                                    | 0.001                              | -0.001       | 0.004        | 0.483   |
| 2:1 - 3:1                                                                                    | 0.001                              | -0.001       | 0.003        | 0.874   |
| <b>gLEA Peak (adjusted for baseline concentration, visit number and time between visits)</b> |                                    |              |              |         |
| 0:1 - 1:1                                                                                    | 0.000                              | -0.002       | 0.002        | 0.998   |
| 0:1 - 2:1                                                                                    | 0.001                              | -0.001       | 0.003        | 0.900   |
| 0:1 - 3:1                                                                                    | 0.002                              | 0.000        | 0.004        | 0.246   |
| 1:1 - 2:1                                                                                    | 0.001                              | -0.002       | 0.003        | 0.957   |
| 1:1 - 3:1                                                                                    | 0.002                              | 0.000        | 0.004        | 0.327   |
| 2:1 - 3:1                                                                                    | 0.001                              | -0.001       | 0.003        | 0.640   |



**eTable 2.** Plasma concentrations vs. time following 10mg THC, 0mg CBD (0:1 ratio) – Model 3a

Statistically significant rows are presented in bold.  
Pre = pre-inhalation plasma sample.

| Contrast                                                                              | Estimated marginal mean difference | Lower 95% CI | Upper 95% CI | p-value      |
|---------------------------------------------------------------------------------------|------------------------------------|--------------|--------------|--------------|
| <b>Anandamide (ng/ml)</b>                                                             |                                    |              |              |              |
| Pre – 0min                                                                            | -0.040                             | -0.070       | -0.010       | 0.069        |
| Pre – 5min                                                                            | 0.003                              | -0.027       | 0.033        | 1.000        |
| Pre – 15min                                                                           | 0.011                              | -0.019       | 0.041        | 0.949        |
| Pre – 90min                                                                           | 0.019                              | -0.011       | 0.049        | 0.735        |
| <b>0min – 5min</b>                                                                    | <b>0.043</b>                       | <b>0.013</b> | <b>0.073</b> | <b>0.040</b> |
| <b>0min – 15min</b>                                                                   | <b>0.051</b>                       | <b>0.021</b> | <b>0.081</b> | <b>0.008</b> |
| <b>0min – 90min</b>                                                                   | <b>0.059</b>                       | <b>0.029</b> | <b>0.089</b> | <b>0.001</b> |
| 5min – 15min                                                                          | 0.008                              | -0.022       | 0.038        | 0.985        |
| 5min – 90min                                                                          | 0.016                              | -0.014       | 0.046        | 0.845        |
| 15min – 90min                                                                         | 0.008                              | -0.022       | 0.038        | 0.988        |
| <b>Anandamide (ng/ml)<br/>(adjusted for visit number<br/>and time between visits)</b> |                                    |              |              |              |
| Pre – 0min                                                                            | -0.040                             | -0.070       | -0.010       | 0.069        |
| Pre – 5min                                                                            | 0.003                              | -0.027       | 0.033        | 1.000        |
| Pre – 15min                                                                           | 0.011                              | -0.019       | 0.041        | 0.949        |
| Pre – 90min                                                                           | 0.019                              | -0.011       | 0.049        | 0.735        |
| <b>0min – 5min</b>                                                                    | <b>0.043</b>                       | <b>0.013</b> | <b>0.073</b> | <b>0.040</b> |
| <b>0min – 15min</b>                                                                   | <b>0.051</b>                       | <b>0.021</b> | <b>0.081</b> | <b>0.008</b> |
| <b>0min – 90min</b>                                                                   | <b>0.059</b>                       | <b>0.029</b> | <b>0.089</b> | <b>0.001</b> |
| 5min – 15min                                                                          | 0.008                              | -0.022       | 0.038        | 0.985        |
| 5min – 90min                                                                          | 0.016                              | -0.014       | 0.046        | 0.845        |
| 15min – 90min                                                                         | 0.008                              | -0.022       | 0.038        | 0.988        |

**eTable 2 continued.**

| <b>Contrast</b>                                                                 | <b>Estimated marginal mean difference</b> | <b>Lower 95% CI</b> | <b>Upper 95% CI</b> | <b>p-value</b> |
|---------------------------------------------------------------------------------|-------------------------------------------|---------------------|---------------------|----------------|
| <b>2-AG (ng/ml)</b>                                                             |                                           |                     |                     |                |
| Pre – 0min                                                                      | 0.513                                     | -1.451              | 2.478               | 0.986          |
| Pre – 5min                                                                      | 0.621                                     | -1.343              | 2.586               | 0.971          |
| Pre – 15min                                                                     | 0.891                                     | -1.073              | 2.855               | 0.898          |
| Pre – 90min                                                                     | 0.291                                     | -1.673              | 2.255               | 0.998          |
| 0min – 5min                                                                     | 0.108                                     | -1.856              | 2.072               | 1.000          |
| 0min – 15min                                                                    | 0.378                                     | -1.587              | 2.342               | 0.996          |
| 0min – 90min                                                                    | -0.222                                    | -2.187              | 1.742               | 0.999          |
| 5min – 15min                                                                    | 0.270                                     | -1.695              | 2.234               | 0.999          |
| 5min – 90min                                                                    | -0.330                                    | -2.295              | 1.634               | 0.997          |
| 15min – 90min                                                                   | -0.600                                    | -2.564              | 1.364               | 0.975          |
| <b>2-AG (ng/ml)<br/>(adjusted for visit number<br/>and time between visits)</b> |                                           |                     |                     |                |
| Pre – 0min                                                                      | 0.513                                     | -1.451              | 2.478               | 0.986          |
| Pre – 5min                                                                      | 0.621                                     | -1.343              | 2.586               | 0.971          |
| Pre – 15min                                                                     | 0.891                                     | -1.073              | 2.855               | 0.898          |
| Pre – 90min                                                                     | 0.291                                     | -1.673              | 2.255               | 0.998          |
| 0min – 5min                                                                     | 0.108                                     | -1.856              | 2.072               | 1.000          |
| 0min – 15min                                                                    | 0.378                                     | -1.587              | 2.342               | 0.996          |
| 0min – 90min                                                                    | -0.222                                    | -2.187              | 1.742               | 0.999          |
| 5min – 15min                                                                    | 0.270                                     | -1.695              | 2.234               | 0.999          |
| 5min – 90min                                                                    | -0.330                                    | -2.295              | 1.634               | 0.997          |
| 15min – 90min                                                                   | -0.600                                    | -2.564              | 1.364               | 0.975          |

**eTable 2 continued.**

| <b>Contrast</b>                                                                             | <b>Estimated marginal mean difference</b> | <b>Lower 95% CI</b> | <b>Upper 95% CI</b> | <b>p-value</b> |
|---------------------------------------------------------------------------------------------|-------------------------------------------|---------------------|---------------------|----------------|
| <b>Arachidonic acid (ng/ml)</b>                                                             |                                           |                     |                     |                |
| Pre – 0min                                                                                  | -33.180                                   | -74.904             | 8.543               | 0.519          |
| Pre – 5min                                                                                  | -46.043                                   | -87.767             | -4.320              | 0.193          |
| Pre – 15min                                                                                 | -5.436                                    | -47.159             | 36.287              | 0.999          |
| Pre – 90min                                                                                 | 3.859                                     | -37.865             | 45.582              | 1.000          |
| 0min – 5min                                                                                 | -12.863                                   | -54.586             | 28.860              | 0.974          |
| 0min – 15min                                                                                | 27.744                                    | -13.979             | 69.468              | 0.684          |
| 0min – 90min                                                                                | 37.039                                    | -4.684              | 78.762              | 0.405          |
| 5min – 15min                                                                                | 40.607                                    | -1.116              | 82.331              | 0.310          |
| 5min – 90min                                                                                | 49.902                                    | 8.179               | 91.626              | 0.131          |
| 15min – 90min                                                                               | 9.295                                     | -32.429             | 51.018              | 0.992          |
| <b>Arachidonic acid (ng/ml)<br/>(adjusted for visit number<br/>and time between visits)</b> |                                           |                     |                     |                |
| Pre – 0min                                                                                  | -33.180                                   | -74.904             | 8.543               | 0.519          |
| Pre – 5min                                                                                  | -46.043                                   | -87.767             | -4.320              | 0.193          |
| Pre – 15min                                                                                 | -5.436                                    | -47.159             | 36.287              | 0.999          |
| Pre – 90min                                                                                 | 3.859                                     | -37.865             | 45.582              | 1.000          |
| 0min – 5min                                                                                 | -12.863                                   | -54.586             | 28.860              | 0.974          |
| 0min – 15min                                                                                | 27.744                                    | -13.979             | 69.468              | 0.684          |
| 0min – 90min                                                                                | 37.039                                    | -4.684              | 78.762              | 0.405          |
| 5min – 15min                                                                                | 40.607                                    | -1.116              | 82.331              | 0.310          |
| 5min – 90min                                                                                | 49.902                                    | 8.179               | 91.626              | 0.131          |
| 15min – 90min                                                                               | 9.295                                     | -32.429             | 51.018              | 0.992          |

eTable 2 continued.

| Contrast                                                                       | Estimated marginal mean difference | Lower 95% CI  | Upper 95% CI  | p-value      |
|--------------------------------------------------------------------------------|------------------------------------|---------------|---------------|--------------|
| <b>DEA (ng/ml)</b>                                                             |                                    |               |               |              |
| <b>Pre – 0min</b>                                                              | <b>-0.013</b>                      | <b>-0.020</b> | <b>-0.005</b> | <b>0.011</b> |
| Pre – 5min                                                                     | -0.001                             | -0.009        | 0.006         | 0.998        |
| Pre – 15min                                                                    | -0.003                             | -0.011        | 0.005         | 0.952        |
| Pre – 90min                                                                    | 0.003                              | -0.004        | 0.011         | 0.907        |
| <b>0min – 5min</b>                                                             | <b>0.012</b>                       | <b>0.004</b>  | <b>0.019</b>  | <b>0.029</b> |
| 0min – 15min                                                                   | 0.010                              | 0.002         | 0.018         | 0.084        |
| <b>0min – 90min</b>                                                            | <b>0.016</b>                       | <b>0.008</b>  | <b>0.024</b>  | <b>0.000</b> |
| 5min – 15min                                                                   | -0.002                             | -0.009        | 0.006         | 0.995        |
| 5min – 90min                                                                   | 0.005                              | -0.003        | 0.012         | 0.756        |
| 15min – 90min                                                                  | 0.006                              | -0.001        | 0.014         | 0.504        |
| <b>DEA (ng/ml)<br/>(adjusted for visit number<br/>and time between visits)</b> |                                    |               |               |              |
| <b>Pre – 0min</b>                                                              | <b>-0.013</b>                      | <b>-0.020</b> | <b>-0.005</b> | <b>0.011</b> |
| Pre – 5min                                                                     | -0.001                             | -0.009        | 0.006         | 0.998        |
| Pre – 15min                                                                    | -0.003                             | -0.011        | 0.005         | 0.952        |
| Pre – 90min                                                                    | 0.003                              | -0.004        | 0.011         | 0.907        |
| <b>0min – 5min</b>                                                             | <b>0.012</b>                       | <b>0.004</b>  | <b>0.019</b>  | <b>0.029</b> |
| 0min – 15min                                                                   | 0.010                              | 0.002         | 0.018         | 0.084        |
| <b>0min – 90min</b>                                                            | <b>0.016</b>                       | <b>0.008</b>  | <b>0.024</b>  | <b>0.000</b> |
| 5min – 15min                                                                   | -0.002                             | -0.009        | 0.006         | 0.995        |
| 5min – 90min                                                                   | 0.005                              | -0.003        | 0.012         | 0.756        |
| 15min – 90min                                                                  | 0.006                              | -0.001        | 0.014         | 0.504        |

eTable 2 continued.

| Contrast                                                                       | Estimated marginal mean difference | Lower 95% CI | Upper 95% CI | p-value      |
|--------------------------------------------------------------------------------|------------------------------------|--------------|--------------|--------------|
| <b>OEA (ng/ml)</b>                                                             |                                    |              |              |              |
| Pre – 0min                                                                     | -0.250                             | -0.432       | -0.068       | 0.057        |
| Pre – 5min                                                                     | -0.109                             | -0.291       | 0.073        | 0.760        |
| Pre – 15min                                                                    | 0.020                              | -0.162       | 0.202        | 0.999        |
| Pre – 90min                                                                    | 0.066                              | -0.116       | 0.248        | 0.952        |
| 0min – 5min                                                                    | 0.141                              | -0.041       | 0.322        | 0.548        |
| <b>0min – 15min</b>                                                            | <b>0.270</b>                       | <b>0.088</b> | <b>0.452</b> | <b>0.031</b> |
| <b>0min – 90min</b>                                                            | <b>0.316</b>                       | <b>0.134</b> | <b>0.498</b> | <b>0.007</b> |
| 5min – 15min                                                                   | 0.129                              | -0.053       | 0.311        | 0.627        |
| 5min – 90min                                                                   | 0.175                              | -0.007       | 0.357        | 0.320        |
| 15min – 90min                                                                  | 0.046                              | -0.136       | 0.228        | 0.987        |
| <b>OEA (ng/ml)<br/>(adjusted for visit number<br/>and time between visits)</b> |                                    |              |              |              |
| Pre – 0min                                                                     | -0.250                             | -0.432       | -0.068       | 0.057        |
| Pre – 5min                                                                     | -0.109                             | -0.291       | 0.073        | 0.760        |
| Pre – 15min                                                                    | 0.020                              | -0.162       | 0.202        | 0.999        |
| Pre – 90min                                                                    | 0.066                              | -0.116       | 0.248        | 0.952        |
| 0min – 5min                                                                    | 0.141                              | -0.041       | 0.322        | 0.548        |
| <b>0min – 15min</b>                                                            | <b>0.270</b>                       | <b>0.088</b> | <b>0.452</b> | <b>0.031</b> |
| <b>0min – 90min</b>                                                            | <b>0.316</b>                       | <b>0.134</b> | <b>0.498</b> | <b>0.007</b> |
| 5min – 15min                                                                   | 0.129                              | -0.053       | 0.311        | 0.627        |
| 5min – 90min                                                                   | 0.175                              | -0.007       | 0.357        | 0.320        |
| 15min – 90min                                                                  | 0.046                              | -0.136       | 0.228        | 0.987        |

**eTable 2 continued.**

| <b>Contrast</b>                                                                | <b>Estimated marginal mean difference</b> | <b>Lower 95% CI</b> | <b>Upper 95% CI</b> | <b>p-value</b> |
|--------------------------------------------------------------------------------|-------------------------------------------|---------------------|---------------------|----------------|
| <b>SEA (ng/ml)</b>                                                             |                                           |                     |                     |                |
| Pre – 0min                                                                     | -0.156                                    | -0.387              | 0.075               | 0.673          |
| Pre – 5min                                                                     | -0.007                                    | -0.238              | 0.224               | 1.000          |
| Pre – 15min                                                                    | -0.013                                    | -0.244              | 0.218               | 1.000          |
| Pre – 90min                                                                    | 0.030                                     | -0.201              | 0.261               | 0.999          |
| 0min – 5min                                                                    | 0.149                                     | -0.082              | 0.380               | 0.709          |
| 0min – 15min                                                                   | 0.143                                     | -0.088              | 0.374               | 0.741          |
| 0min – 90min                                                                   | 0.186                                     | -0.045              | 0.417               | 0.507          |
| 5min – 15min                                                                   | -0.006                                    | -0.237              | 0.225               | 1.000          |
| 5min – 90min                                                                   | 0.037                                     | -0.194              | 0.268               | 0.998          |
| 15min – 90min                                                                  | 0.043                                     | -0.188              | 0.274               | 0.996          |
| <b>SEA (ng/ml)<br/>(adjusted for visit number<br/>and time between visits)</b> |                                           |                     |                     |                |
| Pre – 0min                                                                     | -0.156                                    | -0.387              | 0.075               | 0.673          |
| Pre – 5min                                                                     | -0.007                                    | -0.238              | 0.224               | 1.000          |
| Pre – 15min                                                                    | -0.013                                    | -0.244              | 0.218               | 1.000          |
| Pre – 90min                                                                    | 0.030                                     | -0.201              | 0.261               | 0.999          |
| 0min – 5min                                                                    | 0.149                                     | -0.082              | 0.380               | 0.709          |
| 0min – 15min                                                                   | 0.143                                     | -0.088              | 0.374               | 0.741          |
| 0min – 90min                                                                   | 0.186                                     | -0.045              | 0.417               | 0.507          |
| 5min – 15min                                                                   | -0.006                                    | -0.237              | 0.225               | 1.000          |
| 5min – 90min                                                                   | 0.037                                     | -0.194              | 0.268               | 0.998          |
| 15min – 90min                                                                  | 0.043                                     | -0.188              | 0.274               | 0.996          |

**eTable 2 continued.**

| <b>Contrast</b>                                                                  | <b>Estimated marginal mean difference</b> | <b>Lower 95% CI</b> | <b>Upper 95% CI</b> | <b>p-value</b> |
|----------------------------------------------------------------------------------|-------------------------------------------|---------------------|---------------------|----------------|
| <b>ARA-S (ng/ml)</b>                                                             |                                           |                     |                     |                |
| Pre – 0min                                                                       | -0.009                                    | -0.021              | 0.003               | 0.552          |
| Pre – 5min                                                                       | -0.006                                    | -0.018              | 0.006               | 0.883          |
| Pre – 15min                                                                      | -0.001                                    | -0.013              | 0.011               | 1.000          |
| Pre – 90min                                                                      | -0.001                                    | -0.013              | 0.012               | 1.000          |
| 0min – 5min                                                                      | 0.004                                     | -0.009              | 0.016               | 0.978          |
| 0min – 15min                                                                     | 0.008                                     | -0.004              | 0.020               | 0.657          |
| 0min – 90min                                                                     | 0.009                                     | -0.003              | 0.021               | 0.614          |
| 5min – 15min                                                                     | 0.005                                     | -0.007              | 0.017               | 0.938          |
| 5min – 90min                                                                     | 0.005                                     | -0.007              | 0.017               | 0.918          |
| 15min – 90min                                                                    | 0.000                                     | -0.012              | 0.013               | 1.000          |
| <b>ARA-S (ng/ml)<br/>(adjusted for visit number<br/>and time between visits)</b> |                                           |                     |                     |                |
| Pre – 0min                                                                       | -0.009                                    | -0.021              | 0.003               | 0.552          |
| Pre – 5min                                                                       | -0.006                                    | -0.018              | 0.006               | 0.883          |
| Pre – 15min                                                                      | -0.001                                    | -0.013              | 0.011               | 1.000          |
| Pre – 90min                                                                      | -0.001                                    | -0.013              | 0.012               | 1.000          |
| 0min – 5min                                                                      | 0.004                                     | -0.009              | 0.016               | 0.978          |
| 0min – 15min                                                                     | 0.008                                     | -0.004              | 0.020               | 0.657          |
| 0min – 90min                                                                     | 0.009                                     | -0.003              | 0.021               | 0.614          |
| 5min – 15min                                                                     | 0.005                                     | -0.007              | 0.017               | 0.938          |
| 5min – 90min                                                                     | 0.005                                     | -0.007              | 0.017               | 0.918          |
| 15min – 90min                                                                    | 0.000                                     | -0.012              | 0.013               | 1.000          |

**eTable 2 continued.**

| <b>Contrast</b>                                                                 | <b>Estimated marginal mean difference</b> | <b>Lower 95% CI</b> | <b>Upper 95% CI</b> | <b>p-value</b> |
|---------------------------------------------------------------------------------|-------------------------------------------|---------------------|---------------------|----------------|
| <b>aLEA (ng/ml)</b>                                                             |                                           |                     |                     |                |
| Pre – 0min                                                                      | 0.004                                     | -0.003              | 0.011               | 0.820          |
| Pre – 5min                                                                      | 0.004                                     | -0.003              | 0.010               | 0.857          |
| Pre – 15min                                                                     | 0.004                                     | -0.003              | 0.011               | 0.817          |
| Pre – 90min                                                                     | 0.007                                     | 0.000               | 0.014               | 0.265          |
| 0min – 5min                                                                     | 0.000                                     | -0.007              | 0.007               | 1.000          |
| 0min – 15min                                                                    | 0.000                                     | -0.007              | 0.007               | 1.000          |
| 0min – 90min                                                                    | 0.003                                     | -0.004              | 0.010               | 0.882          |
| 5min – 15min                                                                    | 0.000                                     | -0.007              | 0.007               | 1.000          |
| 5min – 90min                                                                    | 0.004                                     | -0.003              | 0.011               | 0.849          |
| 15min – 90min                                                                   | 0.003                                     | -0.004              | 0.010               | 0.884          |
| <b>aLEA (ng/ml)<br/>(adjusted for visit number<br/>and time between visits)</b> |                                           |                     |                     |                |
| Pre – 0min                                                                      | 0.004                                     | -0.003              | 0.011               | 0.820          |
| Pre – 5min                                                                      | 0.004                                     | -0.003              | 0.010               | 0.857          |
| Pre – 15min                                                                     | 0.004                                     | -0.003              | 0.011               | 0.817          |
| Pre – 90min                                                                     | 0.007                                     | 0.000               | 0.014               | 0.265          |
| 0min – 5min                                                                     | 0.000                                     | -0.007              | 0.007               | 1.000          |
| 0min – 15min                                                                    | 0.000                                     | -0.007              | 0.007               | 1.000          |
| 0min – 90min                                                                    | 0.003                                     | -0.004              | 0.010               | 0.882          |
| 5min – 15min                                                                    | 0.000                                     | -0.007              | 0.007               | 1.000          |
| 5min – 90min                                                                    | 0.004                                     | -0.003              | 0.011               | 0.849          |
| 15min – 90min                                                                   | 0.003                                     | -0.004              | 0.010               | 0.884          |



**eTable 2 continued.**

| <b>Contrast</b>                                                                 | <b>Estimated marginal mean difference</b> | <b>Lower 95% CI</b> | <b>Upper 95% CI</b> | <b>p-value</b> |
|---------------------------------------------------------------------------------|-------------------------------------------|---------------------|---------------------|----------------|
| <b>gLEA (ng/ml)</b>                                                             |                                           |                     |                     |                |
| Pre – 0min                                                                      | 0.005                                     | -0.002              | 0.011               | 0.625          |
| Pre – 5min                                                                      | 0.004                                     | -0.003              | 0.010               | 0.817          |
| Pre – 15min                                                                     | 0.001                                     | -0.005              | 0.008               | 0.995          |
| Pre – 90min                                                                     | 0.005                                     | -0.001              | 0.012               | 0.516          |
| 0min – 5min                                                                     | -0.001                                    | -0.008              | 0.005               | 0.998          |
| 0min – 15min                                                                    | -0.003                                    | -0.010              | 0.003               | 0.849          |
| 0min – 90min                                                                    | 0.001                                     | -0.006              | 0.007               | 1.000          |
| 5min – 15min                                                                    | -0.002                                    | -0.009              | 0.004               | 0.959          |
| 5min – 90min                                                                    | 0.002                                     | -0.005              | 0.008               | 0.988          |
| 15min – 90min                                                                   | 0.004                                     | -0.003              | 0.010               | 0.762          |
| <b>gLEA (ng/ml)<br/>(adjusted for visit number<br/>and time between visits)</b> |                                           |                     |                     |                |
| Pre – 0min                                                                      | 0.005                                     | -0.002              | 0.011               | 0.627          |
| Pre – 5min                                                                      | 0.004                                     | -0.003              | 0.010               | 0.818          |
| Pre – 15min                                                                     | 0.001                                     | -0.005              | 0.008               | 0.995          |
| Pre – 90min                                                                     | 0.005                                     | -0.001              | 0.012               | 0.518          |
| 0min – 5min                                                                     | -0.001                                    | -0.008              | 0.005               | 0.998          |
| 0min – 15min                                                                    | -0.003                                    | -0.010              | 0.003               | 0.850          |
| 0min – 90min                                                                    | 0.001                                     | -0.006              | 0.007               | 1.000          |
| 5min – 15min                                                                    | -0.002                                    | -0.009              | 0.004               | 0.959          |
| 5min – 90min                                                                    | 0.002                                     | -0.005              | 0.008               | 0.988          |
| 15min – 90min                                                                   | 0.004                                     | -0.003              | 0.011               | 0.764          |

**eTable 3.** Plasma concentrations vs. time following 10mg THC (all CBD:THC ratios) – Model 3b

Statistically significant rows are presented in bold.  
Pre = pre-inhalation plasma sample.

| Contrast                                                                                     | Estimated marginal mean difference | Lower 95% CI  | Upper 95% CI  | p-value      |
|----------------------------------------------------------------------------------------------|------------------------------------|---------------|---------------|--------------|
| <b>Anandamide (ng/ml)</b>                                                                    |                                    |               |               |              |
| <b>Pre – 0min</b>                                                                            | <b>-0.044</b>                      | <b>-0.064</b> | <b>-0.025</b> | <b>0.000</b> |
| Pre – 5min                                                                                   | 0.003                              | -0.017        | 0.022         | 0.999        |
| Pre – 15min                                                                                  | 0.001                              | -0.019        | 0.020         | 1.000        |
| Pre – 90min                                                                                  | 0.017                              | -0.002        | 0.037         | 0.420        |
| <b>0min – 5min</b>                                                                           | <b>0.047</b>                       | <b>0.028</b>  | <b>0.067</b>  | <b>0.000</b> |
| <b>0min – 15min</b>                                                                          | <b>0.045</b>                       | <b>0.025</b>  | <b>0.065</b>  | <b>0.000</b> |
| <b>0min – 90min</b>                                                                          | <b>0.061</b>                       | <b>0.042</b>  | <b>0.081</b>  | <b>0.000</b> |
| 5min – 15min                                                                                 | -0.002                             | -0.022        | 0.017         | 1.000        |
| 5min – 90min                                                                                 | 0.014                              | -0.005        | 0.034         | 0.604        |
| 15min – 90min                                                                                | 0.016                              | -0.003        | 0.036         | 0.465        |
| <b>Anandamide (ng/ml) (adjusted for CBD:THC ratio, visit number and time between visits)</b> |                                    |               |               |              |
| <b>Pre – 0min</b>                                                                            | <b>-0.042</b>                      | <b>-0.062</b> | <b>-0.023</b> | <b>0.000</b> |
| Pre – 5min                                                                                   | 0.003                              | -0.016        | 0.022         | 0.998        |
| Pre – 15min                                                                                  | 0.002                              | -0.018        | 0.021         | 1.000        |
| Pre – 90min                                                                                  | 0.018                              | -0.001        | 0.037         | 0.349        |
| <b>0min – 5min</b>                                                                           | <b>0.045</b>                       | <b>0.026</b>  | <b>0.065</b>  | <b>0.000</b> |
| <b>0min – 15min</b>                                                                          | <b>0.044</b>                       | <b>0.025</b>  | <b>0.063</b>  | <b>0.000</b> |
| <b>0min – 90min</b>                                                                          | <b>0.060</b>                       | <b>0.041</b>  | <b>0.080</b>  | <b>0.000</b> |
| 5min – 15min                                                                                 | -0.001                             | -0.021        | 0.018         | 1.000        |
| 5min – 90min                                                                                 | 0.015                              | -0.004        | 0.034         | 0.547        |
| 15min – 90min                                                                                | 0.016                              | -0.003        | 0.036         | 0.457        |

**eTable 3 continued.**

| <b>Contrast</b>                                                                                | <b>Estimated marginal mean difference</b> | <b>Lower 95% CI</b> | <b>Upper 95% CI</b> | <b>p-value</b> |
|------------------------------------------------------------------------------------------------|-------------------------------------------|---------------------|---------------------|----------------|
| <b>2-AG (ng/ml)</b>                                                                            |                                           |                     |                     |                |
| Pre – 0min                                                                                     | 0.030                                     | -0.986              | 1.046               | 1.000          |
| Pre – 5min                                                                                     | 0.251                                     | -0.765              | 1.267               | 0.989          |
| Pre – 15min                                                                                    | 0.083                                     | -0.933              | 1.099               | 1.000          |
| Pre – 90min                                                                                    | -0.521                                    | -1.537              | 0.496               | 0.853          |
| 0min – 5min                                                                                    | 0.221                                     | -0.796              | 1.237               | 0.993          |
| 0min – 15min                                                                                   | 0.053                                     | -0.963              | 1.069               | 1.000          |
| 0min – 90min                                                                                   | -0.551                                    | -1.567              | 0.465               | 0.825          |
| 5min – 15min                                                                                   | -0.168                                    | -1.184              | 0.848               | 0.998          |
| 5min – 90min                                                                                   | -0.771                                    | -1.787              | 0.245               | 0.569          |
| 15min – 90min                                                                                  | -0.603                                    | -1.619              | 0.413               | 0.771          |
| <b>2-AG (ng/ml) (adjusted for<br/>CBD:THC ratio, visit number<br/>and time between visits)</b> |                                           |                     |                     |                |
| Pre – 0min                                                                                     | 0.030                                     | -0.985              | 1.045               | 1.000          |
| Pre – 5min                                                                                     | 0.251                                     | -0.764              | 1.265               | 0.989          |
| Pre – 15min                                                                                    | 0.083                                     | -0.932              | 1.098               | 1.000          |
| Pre – 90min                                                                                    | -0.521                                    | -1.535              | 0.494               | 0.852          |
| 0min – 5min                                                                                    | 0.221                                     | -0.794              | 1.235               | 0.993          |
| 0min – 15min                                                                                   | 0.053                                     | -0.962              | 1.067               | 1.000          |
| 0min – 90min                                                                                   | -0.551                                    | -1.565              | 0.464               | 0.824          |
| 5min – 15min                                                                                   | -0.168                                    | -1.183              | 0.847               | 0.998          |
| 5min – 90min                                                                                   | -0.771                                    | -1.786              | 0.244               | 0.568          |
| 15min – 90min                                                                                  | -0.603                                    | -1.618              | 0.411               | 0.770          |

eTable 3 continued.

| Contrast                                                                                           | Estimated marginal mean difference | Lower 95% CI  | Upper 95% CI  | p-value      |
|----------------------------------------------------------------------------------------------------|------------------------------------|---------------|---------------|--------------|
| <b>Arachidonic acid (ng/ml)</b>                                                                    |                                    |               |               |              |
| Pre – 0min                                                                                         | -28.446                            | -56.267       | -0.625        | 0.263        |
| Pre – 5min                                                                                         | -34.638                            | -62.458       | -6.817        | 0.105        |
| Pre – 15min                                                                                        | -6.587                             | -34.408       | 21.233        | 0.990        |
| Pre – 90min                                                                                        | 15.642                             | -12.179       | 43.463        | 0.805        |
| 0min – 5min                                                                                        | -6.192                             | -34.012       | 21.629        | 0.992        |
| 0min – 15min                                                                                       | 21.859                             | -5.962        | 49.679        | 0.535        |
| <b>0min – 90min</b>                                                                                | <b>44.088</b>                      | <b>16.267</b> | <b>71.909</b> | <b>0.016</b> |
| 5min – 15min                                                                                       | 28.050                             | 0.229         | 55.871        | 0.277        |
| <b>5min – 90min</b>                                                                                | <b>50.279</b>                      | <b>22.459</b> | <b>78.100</b> | <b>0.004</b> |
| 15min – 90min                                                                                      | 22.229                             | -5.592        | 50.050        | 0.518        |
| <b>Arachidonic acid (ng/ml) (adjusted for CBD:THC ratio, visit number and time between visits)</b> |                                    |               |               |              |
| Pre – 0min                                                                                         | -27.334                            | -54.956       | 0.287         | 0.296        |
| Pre – 5min                                                                                         | -34.263                            | -61.885       | -6.641        | 0.107        |
| Pre – 15min                                                                                        | -5.838                             | -33.460       | 21.784        | 0.994        |
| Pre – 90min                                                                                        | 16.478                             | -11.144       | 44.100        | 0.768        |
| 0min – 5min                                                                                        | -6.929                             | -34.550       | 20.693        | 0.988        |
| 0min – 15min                                                                                       | 21.496                             | -6.126        | 49.118        | 0.545        |
| <b>0min – 90min</b>                                                                                | <b>43.812</b>                      | <b>16.191</b> | <b>71.434</b> | <b>0.016</b> |
| 5min – 15min                                                                                       | 28.425                             | 0.803         | 56.047        | 0.257        |
| <b>5min – 90min</b>                                                                                | <b>50.741</b>                      | <b>23.119</b> | <b>78.363</b> | <b>0.003</b> |
| 15min – 90min                                                                                      | 22.316                             | -5.306        | 49.938        | 0.507        |

eTable 3 continued.

| Contrast                                                                                      | Estimated marginal mean difference | Lower 95% CI  | Upper 95% CI  | p-value      |
|-----------------------------------------------------------------------------------------------|------------------------------------|---------------|---------------|--------------|
| <b>DEA (ng/ml)</b>                                                                            |                                    |               |               |              |
| <b>Pre – 0min</b>                                                                             | <b>-0.012</b>                      | <b>-0.016</b> | <b>-0.008</b> | <b>0.000</b> |
| Pre – 5min                                                                                    | 0.002                              | -0.002        | 0.006         | 0.805        |
| Pre – 15min                                                                                   | 0.001                              | -0.003        | 0.005         | 0.995        |
| Pre – 90min                                                                                   | 0.003                              | -0.001        | 0.007         | 0.497        |
| <b>0min – 5min</b>                                                                            | <b>0.014</b>                       | <b>0.010</b>  | <b>0.018</b>  | <b>0.000</b> |
| <b>0min – 15min</b>                                                                           | <b>0.013</b>                       | <b>0.009</b>  | <b>0.017</b>  | <b>0.000</b> |
| <b>0min – 90min</b>                                                                           | <b>0.015</b>                       | <b>0.011</b>  | <b>0.019</b>  | <b>0.000</b> |
| 5min – 15min                                                                                  | -0.001                             | -0.005        | 0.003         | 0.954        |
| 5min – 90min                                                                                  | 0.001                              | -0.003        | 0.005         | 0.988        |
| 15min – 90min                                                                                 | 0.002                              | -0.002        | 0.006         | 0.748        |
| <b>DEA (ng/ml) (adjusted for<br/>CBD:THC ratio, visit number<br/>and time between visits)</b> |                                    |               |               |              |
| <b>Pre – 0min</b>                                                                             | <b>-0.012</b>                      | <b>-0.016</b> | <b>-0.008</b> | <b>0.000</b> |
| Pre – 5min                                                                                    | 0.002                              | -0.002        | 0.006         | 0.795        |
| Pre – 15min                                                                                   | 0.001                              | -0.003        | 0.005         | 0.995        |
| Pre – 90min                                                                                   | 0.003                              | 0.000         | 0.007         | 0.412        |
| <b>0min – 5min</b>                                                                            | <b>0.014</b>                       | <b>0.010</b>  | <b>0.018</b>  | <b>0.000</b> |
| <b>0min – 15min</b>                                                                           | <b>0.012</b>                       | <b>0.008</b>  | <b>0.016</b>  | <b>0.000</b> |
| <b>0min – 90min</b>                                                                           | <b>0.015</b>                       | <b>0.011</b>  | <b>0.019</b>  | <b>0.000</b> |
| 5min – 15min                                                                                  | -0.001                             | -0.005        | 0.002         | 0.952        |
| 5min – 90min                                                                                  | 0.001                              | -0.003        | 0.005         | 0.973        |
| 15min – 90min                                                                                 | 0.003                              | -0.001        | 0.007         | 0.669        |

eTable 3 continued.

| Contrast                                                                                      | Estimated marginal mean difference | Lower 95% CI  | Upper 95% CI  | p-value      |
|-----------------------------------------------------------------------------------------------|------------------------------------|---------------|---------------|--------------|
| <b>OEA (ng/ml)</b>                                                                            |                                    |               |               |              |
| <b>Pre – 0min</b>                                                                             | <b>-0.186</b>                      | <b>-0.296</b> | <b>-0.077</b> | <b>0.008</b> |
| Pre – 5min                                                                                    | -0.023                             | -0.133        | 0.086         | 0.994        |
| Pre – 15min                                                                                   | 0.033                              | -0.076        | 0.142         | 0.976        |
| Pre – 90min                                                                                   | 0.096                              | -0.013        | 0.206         | 0.418        |
| <b>0min – 5min</b>                                                                            | <b>0.163</b>                       | <b>0.054</b>  | <b>0.272</b>  | <b>0.029</b> |
| <b>0min – 15min</b>                                                                           | <b>0.219</b>                       | <b>0.110</b>  | <b>0.329</b>  | <b>0.001</b> |
| <b>0min – 90min</b>                                                                           | <b>0.282</b>                       | <b>0.173</b>  | <b>0.392</b>  | <b>0.000</b> |
| 5min – 15min                                                                                  | 0.056                              | -0.053        | 0.166         | 0.850        |
| 5min – 90min                                                                                  | 0.119                              | 0.010         | 0.229         | 0.203        |
| 15min – 90min                                                                                 | 0.063                              | -0.046        | 0.172         | 0.790        |
| <b>OEA (ng/ml) (adjusted for<br/>CBD:THC ratio, visit number<br/>and time between visits)</b> |                                    |               |               |              |
| <b>Pre – 0min</b>                                                                             | <b>-0.184</b>                      | <b>-0.293</b> | <b>-0.076</b> | <b>0.008</b> |
| Pre – 5min                                                                                    | -0.024                             | -0.133        | 0.084         | 0.992        |
| Pre – 15min                                                                                   | 0.030                              | -0.079        | 0.138         | 0.984        |
| Pre – 90min                                                                                   | 0.095                              | -0.013        | 0.204         | 0.420        |
| <b>0min – 5min</b>                                                                            | <b>0.160</b>                       | <b>0.051</b>  | <b>0.269</b>  | <b>0.032</b> |
| <b>0min – 15min</b>                                                                           | <b>0.214</b>                       | <b>0.105</b>  | <b>0.323</b>  | <b>0.001</b> |
| <b>0min – 90min</b>                                                                           | <b>0.280</b>                       | <b>0.171</b>  | <b>0.388</b>  | <b>0.000</b> |
| 5min – 15min                                                                                  | 0.054                              | -0.055        | 0.163         | 0.866        |
| 5min – 90min                                                                                  | 0.120                              | 0.011         | 0.228         | 0.194        |
| 15min – 90min                                                                                 | 0.066                              | -0.043        | 0.174         | 0.757        |

**eTable 3 continued.**

| <b>Contrast</b>                                                                               | <b>Estimated marginal mean difference</b> | <b>Lower 95% CI</b> | <b>Upper 95% CI</b> | <b>p-value</b> |
|-----------------------------------------------------------------------------------------------|-------------------------------------------|---------------------|---------------------|----------------|
| <b>SEA (ng/ml)</b>                                                                            |                                           |                     |                     |                |
| Pre – 0min                                                                                    | -0.056                                    | -0.163              | 0.052               | 0.847          |
| Pre – 5min                                                                                    | 0.065                                     | -0.043              | 0.172               | 0.762          |
| Pre – 15min                                                                                   | 0.058                                     | -0.049              | 0.166               | 0.822          |
| Pre – 90min                                                                                   | 0.064                                     | -0.043              | 0.171               | 0.770          |
| 0min – 5min                                                                                   | 0.120                                     | 0.013               | 0.227               | 0.181          |
| 0min – 15min                                                                                  | 0.114                                     | 0.007               | 0.221               | 0.226          |
| 0min – 90min                                                                                  | 0.119                                     | 0.012               | 0.227               | 0.186          |
| 5min – 15min                                                                                  | -0.006                                    | -0.113              | 0.101               | 1.000          |
| 5min – 90min                                                                                  | -0.001                                    | -0.108              | 0.106               | 1.000          |
| 15min – 90min                                                                                 | 0.005                                     | -0.102              | 0.113               | 1.000          |
| <b>SEA (ng/ml) (adjusted for<br/>CBD:THC ratio, visit number<br/>and time between visits)</b> |                                           |                     |                     |                |
| Pre – 0min                                                                                    | -0.056                                    | -0.168              | 0.046               | 0.846          |
| Pre – 5min                                                                                    | 0.065                                     | -0.052              | 0.162               | 0.761          |
| Pre – 15min                                                                                   | 0.058                                     | -0.059              | 0.155               | 0.821          |
| Pre – 90min                                                                                   | 0.064                                     | -0.053              | 0.161               | 0.769          |
| 0min – 5min                                                                                   | 0.120                                     | 0.010               | 0.224               | 0.179          |
| 0min – 15min                                                                                  | 0.114                                     | 0.003               | 0.217               | 0.224          |
| 0min – 90min                                                                                  | 0.119                                     | 0.008               | 0.222               | 0.185          |
| 5min – 15min                                                                                  | -0.006                                    | -0.114              | 0.100               | 1.000          |
| 5min – 90min                                                                                  | -0.001                                    | -0.109              | 0.105               | 1.000          |
| 15min – 90min                                                                                 | 0.005                                     | -0.102              | 0.112               | 1.000          |

eTable 3 continued.

| Contrast                                                                                        | Estimated marginal mean difference<br>ARA-S (ng/ml) (adjusted for<br>CBD:THC ratio and visit number) | Lower 95% CI  | Upper 95% CI  | p-value      |
|-------------------------------------------------------------------------------------------------|------------------------------------------------------------------------------------------------------|---------------|---------------|--------------|
| <b>Pre – 0min</b>                                                                               | <b>-0.011</b>                                                                                        | <b>-0.017</b> | <b>-0.004</b> | <b>0.007</b> |
| Pre – 5min                                                                                      | -0.003                                                                                               | -0.009        | 0.003         | 0.895        |
| Pre – 15min                                                                                     | -0.003                                                                                               | -0.009        | 0.003         | 0.903        |
| Pre – 90min                                                                                     | -0.002                                                                                               | -0.008        | 0.004         | 0.967        |
| 0min – 5min                                                                                     | 0.008                                                                                                | 0.002         | 0.014         | 0.104        |
| 0min – 15min                                                                                    | 0.008                                                                                                | 0.002         | 0.014         | 0.098        |
| 0min – 90min                                                                                    | 0.009                                                                                                | 0.002         | 0.015         | 0.054        |
| 5min – 15min                                                                                    | 0.000                                                                                                | -0.006        | 0.006         | 1.000        |
| 5min – 90min                                                                                    | 0.001                                                                                                | -0.005        | 0.007         | 0.999        |
| 15min – 90min                                                                                   | 0.001                                                                                                | -0.006        | 0.007         | 0.999        |
| <b>ARA-S (ng/ml) (adjusted for<br/>CBD:THC ratio, visit number<br/>and time between visits)</b> |                                                                                                      |               |               |              |
| <b>Pre – 0min</b>                                                                               | <b>-0.011</b>                                                                                        | <b>-0.017</b> | <b>-0.004</b> | <b>0.008</b> |
| Pre – 5min                                                                                      | -0.003                                                                                               | -0.009        | 0.003         | 0.890        |
| Pre – 15min                                                                                     | -0.002                                                                                               | -0.008        | 0.004         | 0.964        |
| Pre – 90min                                                                                     | -0.002                                                                                               | -0.008        | 0.004         | 0.977        |
| 0min – 5min                                                                                     | 0.008                                                                                                | 0.001         | 0.014         | 0.114        |
| 0min – 15min                                                                                    | 0.008                                                                                                | 0.002         | 0.015         | 0.060        |
| 0min – 90min                                                                                    | 0.009                                                                                                | 0.002         | 0.015         | 0.050        |
| 5min – 15min                                                                                    | 0.001                                                                                                | -0.005        | 0.007         | 0.999        |
| 5min – 90min                                                                                    | 0.001                                                                                                | -0.005        | 0.007         | 0.998        |
| 15min – 90min                                                                                   | 0.000                                                                                                | -0.006        | 0.006         | 1.000        |



**eTable 3 continued.**

| <b>Contrast</b>                                                                                | <b>Estimated marginal mean difference</b> | <b>Lower 95% CI</b> | <b>Upper 95% CI</b> | <b>p-value</b> |
|------------------------------------------------------------------------------------------------|-------------------------------------------|---------------------|---------------------|----------------|
| <b>aLEA (ng/ml)</b>                                                                            |                                           |                     |                     |                |
| Pre – 0min                                                                                     | 0.001                                     | -0.003              | 0.005               | 0.995          |
| Pre – 5min                                                                                     | 0.002                                     | -0.002              | 0.005               | 0.918          |
| Pre – 15min                                                                                    | 0.002                                     | -0.002              | 0.006               | 0.843          |
| Pre – 90min                                                                                    | 0.002                                     | -0.002              | 0.006               | 0.782          |
| 0min – 5min                                                                                    | 0.001                                     | -0.003              | 0.005               | 0.992          |
| 0min – 15min                                                                                   | 0.001                                     | -0.003              | 0.005               | 0.971          |
| 0min – 90min                                                                                   | 0.001                                     | -0.002              | 0.005               | 0.945          |
| 5min – 15min                                                                                   | 0.000                                     | -0.003              | 0.004               | 1.000          |
| 5min – 90min                                                                                   | 0.001                                     | -0.003              | 0.004               | 0.998          |
| 15min – 90min                                                                                  | 0.000                                     | -0.004              | 0.004               | 1.000          |
| <b>aLEA (ng/ml) (adjusted for<br/>CBD:THC ratio, visit number<br/>and time between visits)</b> |                                           |                     |                     |                |
| Pre – 0min                                                                                     | 0.001                                     | -0.003              | 0.005               | 0.993          |
| Pre – 5min                                                                                     | 0.002                                     | -0.002              | 0.005               | 0.921          |
| Pre – 15min                                                                                    | 0.002                                     | -0.002              | 0.006               | 0.861          |
| Pre – 90min                                                                                    | 0.002                                     | -0.002              | 0.006               | 0.779          |
| 0min – 5min                                                                                    | 0.001                                     | -0.003              | 0.005               | 0.995          |
| 0min – 15min                                                                                   | 0.001                                     | -0.003              | 0.005               | 0.981          |
| 0min – 90min                                                                                   | 0.001                                     | -0.002              | 0.005               | 0.952          |
| 5min – 15min                                                                                   | 0.000                                     | -0.004              | 0.004               | 1.000          |
| 5min – 90min                                                                                   | 0.001                                     | -0.003              | 0.004               | 0.998          |
| 15min – 90min                                                                                  | 0.000                                     | -0.004              | 0.004               | 1.000          |

**eTable 3 continued.**

| <b>Contrast</b>                                                                                | <b>Estimated marginal mean difference</b> | <b>Lower 95% CI</b> | <b>Upper 95% CI</b> | <b>p-value</b> |
|------------------------------------------------------------------------------------------------|-------------------------------------------|---------------------|---------------------|----------------|
| <b>gLEA (ng/ml)</b>                                                                            |                                           |                     |                     |                |
| Pre – 0min                                                                                     | 0.001                                     | -0.002              | 0.004               | 0.891          |
| Pre – 5min                                                                                     | 0.002                                     | -0.001              | 0.005               | 0.788          |
| Pre – 15min                                                                                    | 0.001                                     | -0.002              | 0.004               | 0.940          |
| Pre – 90min                                                                                    | 0.000                                     | -0.003              | 0.003               | 1.000          |
| 0min – 5min                                                                                    | 0.000                                     | -0.003              | 0.003               | 0.999          |
| 0min – 15min                                                                                   | 0.000                                     | -0.003              | 0.003               | 1.000          |
| 0min – 90min                                                                                   | -0.001                                    | -0.004              | 0.002               | 0.920          |
| 5min – 15min                                                                                   | -0.001                                    | -0.004              | 0.002               | 0.996          |
| 5min – 90min                                                                                   | -0.002                                    | -0.005              | 0.001               | 0.831          |
| 15min – 90min                                                                                  | -0.001                                    | -0.004              | 0.002               | 0.960          |
| <b>gLEA (ng/ml) (adjusted for<br/>CBD:THC ratio, visit number<br/>and time between visits)</b> |                                           |                     |                     |                |
| Pre – 0min                                                                                     | 0.001                                     | -0.002              | 0.004               | 0.892          |
| Pre – 5min                                                                                     | 0.002                                     | -0.001              | 0.005               | 0.784          |
| Pre – 15min                                                                                    | 0.001                                     | -0.002              | 0.004               | 0.965          |
| Pre – 90min                                                                                    | 0.000                                     | -0.003              | 0.003               | 1.000          |
| 0min – 5min                                                                                    | 0.000                                     | -0.003              | 0.003               | 0.999          |
| 0min – 15min                                                                                   | 0.000                                     | -0.003              | 0.003               | 0.999          |
| 0min – 90min                                                                                   | -0.001                                    | -0.004              | 0.002               | 0.918          |
| 5min – 15min                                                                                   | -0.001                                    | -0.004              | 0.002               | 0.989          |
| 5min – 90min                                                                                   | -0.002                                    | -0.005              | 0.001               | 0.821          |
| 15min – 90min                                                                                  | -0.001                                    | -0.004              | 0.002               | 0.977          |

**eTable 4.** Pre-inhalation plasma concentrations vs. visit number – Model 4a.

Statistically significant rows are presented in bold.

| Contrast                                                     | Estimated marginal mean difference | Lower 95% CI | Upper 95% CI | p-value      |
|--------------------------------------------------------------|------------------------------------|--------------|--------------|--------------|
| <b>Anandamide (ng/ml)</b>                                    |                                    |              |              |              |
| Visit 1 – Visit 2                                            | 0.006                              | -0.030       | 0.042        | 0.988        |
| 1 – 3                                                        | 0.021                              | -0.015       | 0.057        | 0.651        |
| <b>1 – 4</b>                                                 | <b>0.060</b>                       | <b>0.024</b> | <b>0.096</b> | <b>0.007</b> |
| 2 – 3                                                        | 0.015                              | -0.021       | 0.051        | 0.838        |
| <b>2 – 4</b>                                                 | <b>0.054</b>                       | <b>0.018</b> | <b>0.090</b> | <b>0.019</b> |
| 3 – 4                                                        | 0.039                              | 0.003        | 0.075        | 0.154        |
| <b>Anandamide (ng/ml) (adjusted for time between visits)</b> |                                    |              |              |              |
| 1 – 2                                                        | 0.006                              | -0.035       | 0.048        | 0.990        |
| 1 – 3                                                        | 0.025                              | -0.015       | 0.065        | 0.606        |
| <b>1 – 4</b>                                                 | <b>0.063</b>                       | <b>0.024</b> | <b>0.103</b> | <b>0.010</b> |
| 2 – 3                                                        | 0.019                              | -0.018       | 0.055        | 0.745        |
| <b>2 – 4</b>                                                 | <b>0.057</b>                       | <b>0.021</b> | <b>0.093</b> | <b>0.013</b> |
| 3 – 4                                                        | 0.038                              | 0.002        | 0.074        | 0.156        |
| <b>2-AG (ng/ml)</b>                                          |                                    |              |              |              |
| 1 – 2                                                        | 0.713                              | -1.171       | 2.596        | 0.877        |
| 1 – 3                                                        | -0.927                             | -2.810       | 0.957        | 0.765        |
| 1 – 4                                                        | -0.771                             | -2.654       | 1.113        | 0.850        |
| 2 – 3                                                        | -1.639                             | -3.523       | 0.244        | 0.317        |
| 2 – 4                                                        | -1.483                             | -3.367       | 0.400        | 0.407        |
| 3 – 4                                                        | 0.156                              | -1.727       | 2.040        | 0.998        |
| <b>2-AG (ng/ml) (adjusted for time between visits)</b>       |                                    |              |              |              |
| 1 – 2                                                        | 1.070                              | -0.990       | 3.130        | 0.734        |
| 1 – 3                                                        | -0.452                             | -2.447       | 1.543        | 0.970        |
| 1 – 4                                                        | -0.327                             | -2.301       | 1.646        | 0.988        |
| 2 – 3                                                        | -1.522                             | -3.358       | 0.314        | 0.360        |
| 2 – 4                                                        | -1.397                             | -3.237       | 0.443        | 0.439        |
| 3 – 4                                                        | 0.125                              | -1.696       | 1.946        | 0.999        |

eTable 4 continued.

| Contrast                                                               | Estimated marginal mean difference | Lower 95% CI | Upper 95% CI | p-value      |
|------------------------------------------------------------------------|------------------------------------|--------------|--------------|--------------|
| <b>Arachidonic acid (ng/ml)</b>                                        |                                    |              |              |              |
| Visit 1 – Visit 2                                                      | 25.080                             | -30.462      | 80.623       | 0.808        |
| 1 – 3                                                                  | 5.628                              | -49.914      | 61.171       | 0.997        |
| 1 – 4                                                                  | 45.946                             | -9.596       | 101.489      | 0.362        |
| 2 – 3                                                                  | -19.452                            | -74.995      | 36.090       | 0.900        |
| 2 – 4                                                                  | 20.866                             | -34.677      | 76.408       | 0.880        |
| 3 – 4                                                                  | 40.318                             | -15.225      | 95.860       | 0.480        |
| <b>Arachidonic acid (ng/ml)<br/>(adjusted for time between visits)</b> |                                    |              |              |              |
| 1 – 2                                                                  | 24.413                             | -38.909      | 87.735       | 0.871        |
| 1 – 3                                                                  | 8.438                              | -52.837      | 69.712       | 0.993        |
| 1 – 4                                                                  | 48.571                             | -12.031      | 109.174      | 0.391        |
| 2 – 3                                                                  | -15.975                            | -72.233      | 40.283       | 0.943        |
| 2 – 4                                                                  | 24.158                             | -32.240      | 80.557       | 0.832        |
| 3 – 4                                                                  | 40.134                             | -15.653      | 95.920       | 0.487        |
| <b>DEA (ng/ml)</b>                                                     |                                    |              |              |              |
| 1 – 2                                                                  | 0.003                              | -0.005       | 0.011        | 0.866        |
| 1 – 3                                                                  | 0.004                              | -0.004       | 0.012        | 0.694        |
| <b>1 – 4</b>                                                           | <b>0.011</b>                       | <b>0.003</b> | <b>0.019</b> | <b>0.031</b> |
| 2 – 3                                                                  | 0.001                              | -0.007       | 0.009        | 0.989        |
| 2 – 4                                                                  | 0.008                              | 0.000        | 0.016        | 0.192        |
| 3 – 4                                                                  | 0.007                              | -0.001       | 0.015        | 0.335        |
| <b>DEA (ng/ml) (adjusted<br/>for time between visits)</b>              |                                    |              |              |              |
| 1 – 2                                                                  | 0.002                              | -0.008       | 0.011        | 0.988        |
| 1 – 3                                                                  | 0.004                              | -0.005       | 0.012        | 0.848        |
| 1 – 4                                                                  | 0.010                              | 0.002        | 0.019        | 0.086        |
| 2 – 3                                                                  | 0.002                              | -0.006       | 0.010        | 0.954        |
| 2 – 4                                                                  | 0.009                              | 0.001        | 0.017        | 0.130        |
| 3 – 4                                                                  | 0.007                              | -0.001       | 0.015        | 0.329        |

**eTable 4 continued.**

| <b>Contrast</b>                                       | <b>Estimated marginal mean difference</b> | <b>Lower 95% CI</b> | <b>Upper 95% CI</b> | <b>p-value</b> |
|-------------------------------------------------------|-------------------------------------------|---------------------|---------------------|----------------|
| <b>OEA (ng/ml)</b>                                    |                                           |                     |                     |                |
| Visit 1 – Visit 2                                     | -0.008                                    | -0.205              | 0.189               | 1.000          |
| 1 – 3                                                 | 0.029                                     | -0.168              | 0.226               | 0.991          |
| 1 – 4                                                 | 0.212                                     | 0.014               | 0.409               | 0.151          |
| 2 – 3                                                 | 0.037                                     | -0.160              | 0.234               | 0.982          |
| 2 – 4                                                 | 0.220                                     | 0.022               | 0.417               | 0.128          |
| 3 – 4                                                 | 0.183                                     | -0.015              | 0.380               | 0.263          |
| <b>OEA (ng/ml) (adjusted for time between visits)</b> |                                           |                     |                     |                |
| 1 – 2                                                 | -0.083                                    | -0.310              | 0.143               | 0.886          |
| 1 – 3                                                 | -0.036                                    | -0.254              | 0.183               | 0.988          |
| 1 – 4                                                 | 0.151                                     | -0.065              | 0.368               | 0.512          |
| 2 – 3                                                 | 0.048                                     | -0.153              | 0.248               | 0.965          |
| 2 – 4                                                 | 0.235                                     | 0.034               | 0.435               | 0.100          |
| 3 – 4                                                 | 0.187                                     | -0.012              | 0.385               | 0.249          |
| <b>SEA (ng/ml)</b>                                    |                                           |                     |                     |                |
| 1 – 2                                                 | 0.002                                     | -0.256              | 0.260               | 1.000          |
| 1 – 3                                                 | -0.219                                    | -0.477              | 0.039               | 0.339          |
| 1 – 4                                                 | 0.094                                     | -0.164              | 0.352               | 0.889          |
| 2 – 3                                                 | -0.222                                    | -0.480              | 0.037               | 0.329          |
| 2 – 4                                                 | 0.091                                     | -0.167              | 0.349               | 0.897          |
| 3 – 4                                                 | 0.313                                     | 0.055               | 0.571               | 0.082          |
| <b>SEA (ng/ml) (adjusted for time between visits)</b> |                                           |                     |                     |                |
| 1 – 2                                                 | -0.007                                    | -0.290              | 0.276               | 1.000          |
| 1 – 3                                                 | -0.260                                    | -0.534              | 0.015               | 0.246          |
| 1 – 4                                                 | 0.056                                     | -0.216              | 0.328               | 0.977          |
| 2 – 3                                                 | -0.253                                    | -0.508              | 0.002               | 0.209          |
| 2 – 4                                                 | 0.063                                     | -0.193              | 0.319               | 0.962          |
| 3 – 4                                                 | 0.316                                     | 0.062               | 0.569               | 0.070          |

eTable 4 continued.

| Contrast                                                | Estimated marginal mean difference | Lower 95% CI | Upper 95% CI | p-value |
|---------------------------------------------------------|------------------------------------|--------------|--------------|---------|
| <b>ARA-S (ng/ml)</b>                                    |                                    |              |              |         |
| Visit 1 – Visit 2                                       | -0.002                             | -0.012       | 0.008        | 0.981   |
| 1 – 3                                                   | -0.005                             | -0.016       | 0.005        | 0.726   |
| 1 – 4                                                   | 0.004                              | -0.006       | 0.015        | 0.840   |
| 2 – 3                                                   | -0.003                             | -0.014       | 0.007        | 0.913   |
| 2 – 4                                                   | 0.006                              | -0.004       | 0.017        | 0.620   |
| 3 – 4                                                   | 0.010                              | -0.001       | 0.020        | 0.246   |
| <b>ARA-S (ng/ml) (adjusted for time between visits)</b> |                                    |              |              |         |
| 1 – 2                                                   | -0.001                             | -0.013       | 0.011        | 0.998   |
| 1 – 3                                                   | -0.004                             | -0.015       | 0.007        | 0.902   |
| 1 – 4                                                   | 0.006                              | -0.006       | 0.017        | 0.747   |
| 2 – 3                                                   | -0.003                             | -0.013       | 0.008        | 0.949   |
| 2 – 4                                                   | 0.007                              | -0.004       | 0.017        | 0.570   |
| 3 – 4                                                   | 0.010                              | -0.001       | 0.020        | 0.255   |
| <b>aLEA (ng/ml)</b>                                     |                                    |              |              |         |
| 1 – 2                                                   | -0.005                             | -0.013       | 0.002        | 0.480   |
| 1 – 3                                                   | 0.000                              | -0.007       | 0.007        | 1.000   |
| 1 – 4                                                   | 0.002                              | -0.005       | 0.010        | 0.918   |
| 2 – 3                                                   | 0.005                              | -0.002       | 0.013        | 0.494   |
| 2 – 4                                                   | 0.008                              | 0.000        | 0.015        | 0.165   |
| 3 – 4                                                   | 0.002                              | -0.005       | 0.010        | 0.910   |
| <b>aLEA (ng/ml) (adjusted for time between visits)</b>  |                                    |              |              |         |
| 1 – 2                                                   | -0.007                             | -0.015       | 0.001        | 0.314   |
| 1 – 3                                                   | -0.001                             | -0.009       | 0.007        | 0.987   |
| 1 – 4                                                   | 0.001                              | -0.007       | 0.009        | 0.991   |
| 2 – 3                                                   | 0.006                              | -0.002       | 0.013        | 0.403   |
| 2 – 4                                                   | 0.008                              | 0.001        | 0.016        | 0.118   |
| 3 – 4                                                   | 0.003                              | -0.005       | 0.010        | 0.902   |

**eTable 4 continued.**

| <b>Contrast</b>                                        | <b>Estimated marginal mean difference</b> | <b>Lower 95% CI</b> | <b>Upper 95% CI</b> | <b>p-value</b> |
|--------------------------------------------------------|-------------------------------------------|---------------------|---------------------|----------------|
| <b>gLEA (ng/ml)</b>                                    |                                           |                     |                     |                |
| Visit 1 – Visit 2                                      | -0.004                                    | -0.011              | 0.002               | 0.563          |
| 1 – 3                                                  | 0.001                                     | -0.006              | 0.008               | 0.993          |
| 1 – 4                                                  | 0.000                                     | -0.007              | 0.006               | 1.000          |
| 2 – 3                                                  | 0.005                                     | -0.001              | 0.012               | 0.395          |
| 2 – 4                                                  | 0.004                                     | -0.003              | 0.011               | 0.618          |
| 3 – 4                                                  | -0.001                                    | -0.008              | 0.005               | 0.984          |
| <b>gLEA (ng/ml) (adjusted for time between visits)</b> |                                           |                     |                     |                |
| 1 – 2                                                  | -0.004                                    | -0.012              | 0.003               | 0.625          |
| 1 – 3                                                  | 0.001                                     | -0.006              | 0.008               | 0.995          |
| 1 – 4                                                  | 0.000                                     | -0.007              | 0.007               | 1.000          |
| 2 – 3                                                  | 0.005                                     | -0.001              | 0.012               | 0.388          |
| 2 – 4                                                  | 0.004                                     | -0.003              | 0.011               | 0.609          |
| 3 – 4                                                  | -0.001                                    | -0.008              | 0.005               | 0.984          |

**eTable 5.** Pre-inhalation plasma concentrations of AEA and DEA vs. total CBD dose from previous visits – Models 4b, 4c and 4d.

Possible previous doses of CBD at beginning of:

Visit 2: 0, 10, 20 or 30mg

Visit 3: 10, 20, 30, 40 or 50mg

Visit 4: 30, 40, 50 or 60mg

| Contrast                                                                  | Estimated marginal mean difference | Lower 95% CI | Upper 95% CI | p-value |
|---------------------------------------------------------------------------|------------------------------------|--------------|--------------|---------|
| <b>Visit 2 - Anandamide (ng/ml)</b><br>(adjusted for time between visits) |                                    |              |              |         |
| 0mg – 10mg                                                                | 0.007                              | -0.093       | 0.108        | 0.999   |
| 0mg – 20mg                                                                | 0.028                              | -0.076       | 0.131        | 0.949   |
| 0mg – 30mg                                                                | 0.044                              | -0.076       | 0.164        | 0.881   |
| 10mg – 20mg                                                               | 0.020                              | -0.079       | 0.119        | 0.976   |
| 10mg – 30mg                                                               | 0.036                              | -0.079       | 0.151        | 0.918   |
| 20mg – 30mg                                                               | 0.016                              | -0.103       | 0.136        | 0.993   |
| <b>Visit 3 - Anandamide (ng/ml)</b><br>(adjusted for time between visits) |                                    |              |              |         |
| 30mg – 40mg                                                               | -0.020                             | -0.146       | 0.105        | 0.998   |
| 30mg – 50mg                                                               | 0.004                              | -0.105       | 0.113        | 1.000   |
| 30mg – 60mg                                                               | 0.018                              | -0.115       | 0.151        | 0.999   |
| 30mg – 70mg                                                               | 0.086                              | -0.049       | 0.221        | 0.700   |
| 40mg – 50mg                                                               | 0.024                              | -0.081       | 0.129        | 0.990   |
| 40mg – 60mg                                                               | 0.038                              | -0.087       | 0.164        | 0.972   |
| 40mg – 70mg                                                               | 0.106                              | -0.031       | 0.243        | 0.530   |
| 50mg – 60mg                                                               | 0.014                              | -0.100       | 0.128        | 0.999   |
| 50mg – 70mg                                                               | 0.082                              | -0.040       | 0.203        | 0.656   |
| 60mg – 70mg                                                               | 0.068                              | -0.076       | 0.211        | 0.875   |
| <b>Visit 4 - Anandamide (ng/ml)</b><br>(adjusted for time between visits) |                                    |              |              |         |
| 30mg – 40mg                                                               | 0.038                              | -0.080       | 0.053        | 0.972   |
| 30mg – 50mg                                                               | 0.024                              | -0.070       | 0.054        | 0.990   |
| 30mg – 60mg                                                               | 0.086                              | -0.075       | 0.053        | 0.700   |
| 40mg – 50mg                                                               | 0.018                              | -0.066       | 0.078        | 0.999   |
| 40mg – 60mg                                                               | 0.004                              | -0.070       | 0.076        | 1.000   |
| 50mg – 60mg                                                               | -0.020                             | -0.072       | 0.067        | 0.998   |



**eTable 5 continued.**

| <b>Contrast</b>                           | <b>Estimated marginal mean difference</b> | <b>Lower 95% CI</b> | <b>Upper 95% CI</b> | <b>p-value</b> |
|-------------------------------------------|-------------------------------------------|---------------------|---------------------|----------------|
| <b>Visit 2 - DEA (ng/ml)</b>              |                                           |                     |                     |                |
| <b>(adjusted for time between visits)</b> |                                           |                     |                     |                |
| 0mg – 10mg                                | 0.014                                     | -0.005              | 0.033               | 0.470          |
| 0mg – 20mg                                | 0.017                                     | -0.003              | 0.037               | 0.351          |
| 0mg – 30mg                                | -0.001                                    | -0.024              | 0.022               | 1.000          |
| 10mg – 20mg                               | 0.003                                     | -0.017              | 0.022               | 0.993          |
| 10mg – 30mg                               | -0.015                                    | -0.037              | 0.007               | 0.525          |
| 20mg – 30mg                               | -0.018                                    | -0.041              | 0.005               | 0.422          |
| <b>Visit 3 – DEA (ng/ml)</b>              |                                           |                     |                     |                |
| <b>(adjusted for time between visits)</b> |                                           |                     |                     |                |
| 30mg – 40mg                               | -0.003                                    | -0.034              | 0.028               | 1.000          |
| 30mg – 50mg                               | 0.000                                     | -0.027              | 0.026               | 1.000          |
| 30mg – 60mg                               | 0.013                                     | -0.019              | 0.044               | 0.931          |
| 30mg – 70mg                               | 0.022                                     | -0.010              | 0.055               | 0.634          |
| 40mg – 50mg                               | 0.003                                     | -0.024              | 0.029               | 1.000          |
| 40mg – 60mg                               | 0.016                                     | -0.015              | 0.047               | 0.844          |
| 40mg – 70mg                               | 0.025                                     | -0.008              | 0.059               | 0.549          |
| 50mg – 60mg                               | 0.013                                     | -0.014              | 0.040               | 0.871          |
| 50mg – 70mg                               | 0.023                                     | -0.006              | 0.052               | 0.517          |
| 60mg – 70mg                               | 0.010                                     | -0.025              | 0.044               | 0.978          |
| <b>Visit 4 – DEA (ng/ml)</b>              |                                           |                     |                     |                |
| <b>(adjusted for time between visits)</b> |                                           |                     |                     |                |
| 30mg – 40mg                               | -0.001                                    | -0.015              | 0.014               | 1.000          |
| 30mg – 50mg                               | -0.002                                    | -0.016              | 0.012               | 0.994          |
| 30mg – 60mg                               | 0.007                                     | -0.007              | 0.021               | 0.767          |
| 40mg – 50mg                               | -0.001                                    | -0.017              | 0.015               | 0.998          |
| 40mg – 60mg                               | 0.007                                     | -0.009              | 0.024               | 0.798          |
| 50mg – 60mg                               | 0.009                                     | -0.007              | 0.024               | 0.675          |

## eResults

### Sex differences

There were no significant sex differences between the endocannabinoids or related non-cannabinoid lipid responses to THC or CBD, with the exception of Model 3b (effect of drug administration: all CBD:THC ratios) and Model 4a (effect of visit number on plasma concentrations) for SEA:

#### Overall effect of THC

Mean SEA concentration in men rose by 127.2% (0.220ng/ml [95%CI: 0.075–0.364],  $t(854)=2.981$ ,  $p=0.025$ ) immediately post-inhalation, before falling to pre-inhalation levels by 5min. In women, there was no significant change in SEA concentration across the sampling timepoints ( $p>0.05$ ). However, an outlier was identified using Rosner's generalised extreme Studentised deviate test in a male participant (0 min, value= 4.527ng/ml, 55.8% higher than next highest value for that timepoint). When this outlier value was removed, there was no longer a significant change in mean SEA concentration in men ( $p=0.060$ ).

#### Effect of visit order on endocannabinoid levels

Over the four experimental visits, pre-inhalation plasma levels of SEA did not significantly change in men ( $p>0.05$ ) but did alter in women. Between visits 1 and 3, mean SEA concentrations rose by 315.6% (0.584ng/ml [95%CI: 0.192–0.975],  $t(140)=2.949$ ,  $p=0.019$ ), before falling again by visit 4 (-76.3%, 0.594ng/ml [95%CI: 0.221–0.967],  $t(131)=3.153$ ,  $p=0.011$ ). However, an outlier was identified using Rosner's generalised extreme Studentised deviate test in a female participant (visit 3, value= 5.830ng/ml, 115.6% higher than next highest value for that visit). When this outlier value was removed, there was no longer a significant change in pre-inhalation SEA between visits in women ( $p\geq 0.128$ ).

#### Effect of peak THC concentration

There was a negative correlation between peak THC plasma concentration and change in DEA plasma concentration immediately post-inhalation ( $R= -0.162$  [95%CI: -0.018 to -0.300],  $t(182)= -2.2181$ ,  $p=0.028$ ). This was no longer significant, however, when the model was fully adjusted for pre-inhalation concentration of DEA ( $p=0.279$ ).

There was no correlation between peak THC concentration and change in any of the other analytes ( $p>0.05$ ).

## References

1. Selzer ML. The Michigan Alcoholism Screening Test: The Quest for a New Diagnostic Instrument. *Am J Psychiatry* 1971;127(12):1653–1658; doi: 10.1176/ajp.127.12.1653.
2. Heatherton T, Kozlowski L, Frecker R, et al. The Fagerstrom Test for Nicotine Dependence: A Revision of the Fagerstrom Tolerance Questionnaire. *Br J Addict* 1991;86(9):1119–1127.
3. Skinner HA. The Drug Abuse Screening Test. *Int J* 1983;1:363–371.
4. Stefanis NC, Hanssen M, Smirnis NK, et al. Evidence That Three Dimensions of Psychosis Have a Distribution in the General Population. *Psychol Med* 2002;32(2):347–58.
5. Brandt J. The Hopkins Verbal Learning Test: Development of a New Memory Test with Six Equivalent Forms. *Clin Neuropsychol* 1991;5(2):125–142; doi: 10.1080/13854049108403297.
6. Kay SR, Fiszbein A and Opler LA. The Positive and Negative Syndrome Scale (PANSS) for Schizophrenia. *Schizophr Bull* 1987;13(2):261–76.
7. Mason OJ, Morgan CJM, Stefanovic A, et al. The Psychotomimetic States Inventory (PSI): Measuring Psychotic-Type Experiences from Ketamine and Cannabis. *Schizophr Res* 2008;103(1–3):138–142; doi: 10.1016/j.schres.2008.02.020.
8. Freeman TP, Morgan CJA, Vaughn-Jones J, et al. Cognitive and Subjective Effects of Mephedrone and Factors Influencing Use of a ‘New Legal High.’ *Addiction* 2012;107(4):792–800; doi: 10.1111/j.1360-0443.2011.03719.x.
9. Freeman D, Pugh K, Green C, et al. A Measure of State Persecutory Ideation for Experimental Studies. *J Nerv Ment Dis* 2007;195(9):781–784; doi: 10.1097/NMD.0b013e318145a0a9.
10. Huestis MA. Pharmacokinetics and Metabolism of the Plant Cannabinoids,  $\Delta^9$ -Tetrahydrocannabinol, Cannabidiol and Cannabinol. In: *Handbook of Experimental Pharmacology*. (Pertwee RG. ed) Springer Nature: Berlin; 2005; pp. 657–690; doi: 10.1007/3-540-26573-2-23.
11. Hartman RL, Brown TL, Milavetz G, et al. Controlled Cannabis Vaporizer Administration: Blood and Plasma Cannabinoids with and without Alcohol. *Clin Chem* 2015;61(6):850–869; doi: 10.1373/clinchem.2015.238287.
